# Supplementary material for: DNA barcode-based survey documents underestimated diversity and intricate phylogeographic patterns of aquatic Heteroptera in an endangered Balkan biodiversity hotspot: ancient Lake Skadar basin
Source: Research Square preprint supplement (doi:10.21203/rs.3.rs-3163326/v1), 2023-07-13
Supplement: Supplementary file 1 [file 12d8feda58042b4d520de841.xlsx]

## Sheet: Table S3_ASAP
Supplementary information to:
DNA barcode-based survey documents underestimated diversity and intricate phylogeographic patterns of aquatic Heteroptera in an endangered Balkan biodiversity hotspot: ancient Lake Skadar basin
Tomasz Rewicz, Grzegorz Tończyk, Łukasz Trębicki, Piotr Gadawski, Tomasz Mamos, Vladimir Pešić, Andrzej Zawal, Michał Grabowski
Table S3 Results of the ASAP delimitation
Partition 1
Asap-Score: 9.500000
Proba: 1.999980e-05
Nb subsets with recursion:81 (without recursion: 78)
Treshold dist.:0.022
------------------------------------------------------------
Subset[ 1 ] n: 33 ;id: VARPL012-21|Microvelia_reticulata|Poland|BOLD:AAG4341 VARPL014-21|Microvelia_reticulata|Poland|BOLD:AAG4341 BCEAB280-16|Microvelia_reticulata|Germany|BOLD:AAG4341 FBAQU208-09|Microvelia_reticulata|Germany|BOLD:AAG4341 FBAQU1520-13|Microvelia_reticulata|Germany|BOLD:AAG4341 BCEAB554-17|Microvelia_reticulata|Austria|BOLD:AAG4341 BCEAB555-17|Microvelia_reticulata|Austria|BOLD:…
Subset[ 2 ] n: 1 ;id: FBAQU020-09|Microvelia_reticulata|Germany|BOLD:AAG4340
Subset[ 3 ] n: 25 ;id: ZMBN308-16|Velia_caprai|Norway|BOLD:AAN0455 ZMBN016-15|Velia_caprai|Norway|BOLD:AAN0455 DTNHM3557-21|Velia_caprai|United_Kingdom|BOLD:AAN0455 FBAQU715-10|Velia_caprai|Germany|BOLD:AAN0455 BCEAB490-17|Velia_caprai|Germany|BOLD:AAN0455 BCEAB506-17|Velia_caprai|Germany|BOLD:AAN0455 EUBUG526-11|Velia_caprai|Germany|BOLD:AAN0455 EUBUG525-11|Velia_caprai|Germany|BOLD:AAN0455 BCEA…
Subset[ 4 ] n: 1 ;id: FBHET671-12|Velia_saulii|Germany|BOLD:ABX0836
Subset[ 5 ] n: 3 ;id: BCEAB623-17|Velia_currens|Switzerland|BOLD:ADI1962 BCEAB624-17|Velia_currens|Switzerland|BOLD:ADI1962 BCEAB625-17|Velia_currens|Switzerland|BOLD:ADI1962
Subset[ 6 ] n: 16 ;id: MOHET054-20|Velia_affinis|Montenegro|BOLD:AEG0715 MOHET080-20|Velia_affinis|Montenegro|BOLD:AEG0715 MOHET159-20|Velia_affinis|Montenegro|BOLD:AEG0715 MOHET079-20|Velia_affinis|Montenegro|BOLD:AEG0715 MOHET067-20|Velia_affinis|Montenegro|BOLD:AEG0715 MOHET081-20|Velia_affinis|Montenegro|BOLD:AEG0715 MOHET160-20|Velia_affinis|Montenegro|BOLD:AEG0715 MOHET066-20|Velia_affinis|…
Subset[ 7 ] n: 3 ;id: MOHET090-20|Velia_sp.|Montenegro|BOLD:AEF9274 MOHET091-20|Velia_sp.|Montenegro|BOLD:AEF9274 MOHET170-21|Velia_sp.|Montenegro|BOLD:AEF9274
Subset[ 8 ] n: 29 ;id: VARPL006-21|Gerris_odontogaster|Poland|BOLD:ADD1838 VARPL005-21|Gerris_odontogaster|Poland|BOLD:ADD1838 VARPL017-21|Gerris_odontogaster|Poland|BOLD:ADD1838 VARPL016-21|Gerris_odontogaster|Poland|BOLD:ADD1838 BCEAB209-16|Gerris_odontogaster|Germany|BOLD:ADD1838 BCEAB210-16|Gerris_odontogaster|Germany|BOLD:ADD1838 BCEAB211-16|Gerris_odontogaster|Germany|BOLD:ADD1838 BCEAB213-…
Subset[ 9 ] n: 36 ;id: PLHET030-21|Gerris_argentatus|Poland|BOLD:ADD1846 BCEAB429-16|Gerris_argentatus|Germany|BOLD:ADD1846 BCEAB426-16|Gerris_argentatus|Germany|BOLD:ADD1846 BCEAB229-16|Gerris_argentatus|Germany|BOLD:ADD1846 BCEAB427-16|Gerris_argentatus|Germany|BOLD:ADD1846 BCEAB428-16|Gerris_argentatus|Germany|BOLD:ADD1846 BCEAB224-16|Gerris_argentatus|Germany|BOLD:ADD1846 BCEAB225-16|Gerris_a…
Subset[ 10 ] n: 28 ;id: OHRBA241-22|Gerris_costae|Macedonia|BOLD:ACI6181 BCEAB583-17|Gerris_costae|Switzerland|BOLD:ACI6181 BCEAB197-16|Gerris_costae|Austria|BOLD:ACI6181 BCEAB198-16|Gerris_costae|Austria|BOLD:ACI6181 BCEAB199-16|Gerris_costae|Austria|BOLD:ACI6181 BCEAB200-16|Gerris_costae|Austria|BOLD:ACI6181 BCEAB201-16|Gerris_costae|Austria|BOLD:ACI6181 BCEAB202-16|Gerris_costae|Austria|BOLD:A…
Subset[ 11 ] n: 10 ;id: BCEAB205-16|Gerris_thoracicus|Germany|BOLD:ACB1745 FBAQU1273-12|Gerris_thoracicus|Germany|BOLD:ACB1745 MOHET044-20|Gerris_thoracicus|Montenegro|BOLD:ACB1745 MOHET042-20|Gerris_thoracicus|Montenegro|BOLD:ACB1745 MOHET041-20|Gerris_thoracicus|Montenegro|BOLD:ACB1745 MOHET155-20|Gerris_thoracicus|Montenegro|BOLD:ACB1745 MOHET088-20|Gerris_thoracicus|Montenegro|BOLD:ACB1745 BC…
Subset[ 12 ] n: 47 ;id: PLHET021-21|Gerris_lacustris|Poland|BOLD:ACT3584 PLHET020-21|Gerris_lacustris|Poland|BOLD:ACT3584 MOHET102-20|Gerris_lacustris|Albania|BOLD:ACT3584 MOHET221-21|Gerris_lacustris|Montenegro|BOLD:ACT3584 BCEAB390-16|Gerris_lacustris|Germany|BOLD:ACT3584 BCEAB433-16|Gerris_lacustris|Germany|BOLD:ACT3584 BCEAB431-16|Gerris_lacustris|Germany|BOLD:ACT3584 BCEAB175-16|Gerris_lacus…
Subset[ 13 ] n: 13 ;id: BCEAB187-16|Gerris_gibbifer|Germany|BOLD:ACB1756 BCEAB188-16|Gerris_gibbifer|Germany|BOLD:ACB1756 BCEAB189-16|Gerris_gibbifer|Germany|BOLD:ACB1756 BCEAB191-16|Gerris_gibbifer|Germany|BOLD:ACB1756 BCEAB193-16|Gerris_gibbifer|Germany|BOLD:ACB1756 BCEAB194-16|Gerris_gibbifer|Germany|BOLD:ACB1756 BCEAB195-16|Gerris_gibbifer|Germany|BOLD:ACB1756 BCEAB196-16|Gerris_gibbifer|Germ…
Subset[ 14 ] n: 13 ;id: ZMBN1969-21|Gerris_lateralis|Norway|BOLD:ABA3327 COLFH1910-16|Gerris_lateralis|Finland|BOLD:ABA3327 MOHET258-21|Gerris_lateralis|Montenegro|BOLD:ABA3327 MOHET168-21|Gerris_lateralis|Montenegro|BOLD:ABA3327 BCEAB034-16|Gerris_lateralis|Germany|BOLD:ABA3327 HETFI007-11|Gerris_lateralis|Norway|BOLD:ABA3327 BCEAB618-17|Gerris_lateralis|Germany|BOLD:ABA3327 MOHET163-20|Gerris_l…
Subset[ 15 ] n: 23 ;id: BCEAB251-16|Aquarius_najas|Germany|BOLD:AAN1521 BCEAB250-16|Aquarius_najas|Germany|BOLD:AAN1521 FBAQU697-10|Aquarius_najas|Germany|BOLD:AAN1521 MOHET073-20|Aquarius_najas|Montenegro|BOLD:AAN1521 MOHET075-20|Aquarius_najas|Montenegro|BOLD:AAN1521 MOHET216-21|Aquarius_najas|Montenegro|BOLD:AAN1521 MOHET217-21|Aquarius_najas|Montenegro|BOLD:AAN1521 MOHET218-21|Aquarius_najas|…
Subset[ 16 ] n: 3 ;id: FBAQU1516-13|Limnoporus_rufoscutellatus|Germany|BOLD:AAV0261 FBAQU1280-12|Limnoporus_rufoscutellatus|Germany|BOLD:AAV0261 BCEAB248-16|Limnoporus_rufoscutellatus|Austria|BOLD:AAV0261
Subset[ 17 ] n: 39 ;id: PLHET022-21|Aquarius_paludum|Poland|BOLD:AAI7450 BCEAB254-16|Aquarius_paludum|Germany|BOLD:AAI7450 BCEAB255-16|Aquarius_paludum|Germany|BOLD:AAI7450 BCEAB582-17|Aquarius_paludum|Germany|BOLD:AAI7450 BCEAB256-16|Aquarius_paludum|Germany|BOLD:AAI7450 PLHET001-21|Aquarius_paludum|Poland|BOLD:AAI7450 GBMHH26917-19|Aquarius_paludum|France|BOLD:AAI7450 PLHET002-21|Aquarius_palud…
Subset[ 18 ] n: 2 ;id: LEFIJ7747-18|Microvelia_buenoi|Finland|BOLD:ACY1789 BCEAB163-16|Microvelia_buenoi|Germany|BOLD:ACY1789
Subset[ 19 ] n: 1 ;id: IBIHP104-20|Naucoris_maculatus|Portugal|BOLD:AEE8147
Subset[ 20 ] n: 9 ;id: DTNHM3567-21|Plea_minutissima|United_Kingdom|BOLD:ACY0868 BCEAB413-16|Plea_minutissima|Germany|BOLD:ACY0868 BCEAB478-17|Plea_minutissima|Germany|BOLD:ACY0868 BCEAB476-17|Plea_minutissima|Germany|BOLD:ACY0868 BCEAB375-16|Plea_minutissima|Germany|BOLD:ACY0868 BCEAB377-16|Plea_minutissima|Germany|BOLD:ACY0868 BCEAB475-17|Plea_minutissima|Germany|BOLD:ACY0868 BCEAB485-17|Plea_m…
Subset[ 21 ] n: 15 ;id: COLFH2033-16|Plea_minutissima|Finland|BOLD:AAF3832 COLFH2034-16|Plea_minutissima|Finland|BOLD:AAF3832 COLFH2032-16|Plea_minutissima|Finland|BOLD:AAF3832 BCEAB444-16|Plea_minutissima|Germany|BOLD:AAF3832 MOHET145-20|Plea_minutissima|Albania|BOLD:AAF3832 MOHET146-20|Plea_minutissima|Albania|BOLD:AAF3832 MOHET144-20|Plea_minutissima|Albania|BOLD:AAF3832 BCEAB414-16|Plea_minut…
Subset[ 22 ] n: 63 ;id: DTNHM2305-21|Notonecta_glauca|United_Kingdom|BOLD:AAK4442 PLHET029-21|Notonecta_glauca|Poland|BOLD:AAK4442 BCEAB463-17|Notonecta_glauca|Germany|BOLD:AAK4442 BCEAB037-16|Notonecta_glauca|Germany|BOLD:AAK4442 BCEAB038-16|Notonecta_glauca|Germany|BOLD:AAK4442 BCEAB045-16|Notonecta_glauca|Germany|BOLD:AAK4442 BCEAB382-16|Notonecta_glauca|Germany|BOLD:AAK4442 PLSW111-20|Notonec…
Subset[ 23 ] n: 11 ;id: BCEAB409-16|Notonecta_viridis|Germany|BOLD:ABV0133 BCEAB442-16|Notonecta_viridis|Germany|BOLD:ABV0133 BCEAB510-17|Notonecta_viridis|Germany|BOLD:ABV0133 BCEAB580-17|Notonecta_viridis|Germany|BOLD:ABV0133 BCEAB378-16|Notonecta_viridis|Germany|BOLD:ABV0133 BCEAB379-16|Notonecta_viridis|Germany|BOLD:ABV0133 FBAQU1290-12|Notonecta_viridis|Germany|BOLD:ABV0133 BCEAB443-16|Noton…
Subset[ 24 ] n: 29 ;id: COLFH2047-16|Notonecta_reuteri|Finland|BOLD:ACE8526 FBHET946-12|Notonecta_reuteri|Germany|BOLD:ACE8526 FBHET1043-12|Notonecta_reuteri|Germany|BOLD:ACE8526 FBHET1039-12|Notonecta_reuteri|Germany|BOLD:ACE8526 BCEAB578-17|Notonecta_reuteri|Germany|BOLD:ACE8526 PLSW149-20|Notonecta_reuteri|Poland|BOLD:ACE8526 PLSW171-20|Notonecta_reuteri|Poland|BOLD:ACE8526 FBHET1042-12|Notone…
Subset[ 25 ] n: 31 ;id: MOHET248-21|Notonecta_maculata|Albania|BOLD:AEF8405 MOHET249-21|Notonecta_maculata|Albania|BOLD:AEF8405 MOHET250-21|Notonecta_maculata|Albania|BOLD:AEF8405 MOHET251-21|Notonecta_maculata|Albania|BOLD:AEF8405 MOHET035-20|Notonecta_maculata|Montenegro|BOLD:AEF8405 MOHET138-20|Notonecta_maculata|Albania|BOLD:AEF8405 MOHET167-21|Notonecta_maculata|Montenegro|BOLD:AEF8405 MOHET…
Subset[ 26 ] n: 14 ;id: PLHET009-21|Aphelocheirus_aestivalis|Poland|BOLD:ABX0398 HEMFI025-12|Aphelocheirus_aestivalis|Finland|BOLD:ABX0398 GBMIX2984-16|Aphelocheirus_aestivalis|Germany|BOLD:ABX0398 GBMIX2985-16|Aphelocheirus_aestivalis|Germany|BOLD:ABX0398 GHET005-18|Aphelocheirus_aestivalis|Germany|BOLD:ABX0398 GHET006-18|Aphelocheirus_aestivalis|Germany|BOLD:ABX0398 GHET008-18|Aphelocheirus_aes…
Subset[ 27 ] n: 8 ;id: MOHET256-21|Anisops_sardeus|Montenegro|BOLD:ABV0079 BCEAB525-17|Anisops_sardeus|Greece|BOLD:ABV0079 BCEAB526-17|Anisops_sardeus|Greece|BOLD:ABV0079 IBIHP114-20|Anisops_sardeus|Portugal|BOLD:ABV0079 MOHET133-20|Anisops_sardeus|Montenegro|BOLD:ABV0079 BCEAB527-17|Anisops_sardeus|Greece|BOLD:ABV0079 BCEAB528-17|Anisops_sardeus|Greece|BOLD:ABV0079 BCEAB529-17|Anisops_sardeus|Gr…
Subset[ 28 ] n: 35 ;id: DTNHM2685-21|Sigara_distincta|United_Kingdom|BOLD:AAH9524 BCEAB070-16|Sigara_iactans|Germany|BOLD:AAH9524 BCEAB383-16|Sigara_falleni|Germany|BOLD:AAH9524 FBAQU1292-12|Sigara_falleni|Germany|BOLD:AAH9524 FBAQU016-09|Sigara_falleni|Germany|BOLD:AAH9524 BCEAB021-16|Sigara_iactans|Germany|BOLD:AAH9524 PLHET031-21|Sigara_falleni|Poland|BOLD:AAH9524 BCEAB069-16|Sigara_iactans|Ge…
Subset[ 29 ] n: 3 ;id: GBMND50724-21|Sigara_distincta|Spain|BOLD:ABV4484 BCEAB435-16|Sigara_distincta|Germany|BOLD:ABV4484 GBMND50723-21|Sigara_distincta|Spain|BOLD:ABV4484
Subset[ 30 ] n: 5 ;id: DTNHM3639-21|Sigara_fossarum|United_Kingdom|BOLD:AAJ6707 HEMFI023-12|Sigara_fossarum|Finland|BOLD:AAJ6707 FBAQU210-09|Sigara_fossarum|Germany|BOLD:AAJ6707 HEMFI022-12|Sigara_fossarum|Finland|BOLD:AAJ6707 FBAQU1293-12|Sigara_fossarum|Germany|BOLD:AAJ6707
Subset[ 31 ] n: 10 ;id: BCEAB457-17|Sigara_scotti|Germany|BOLD:ACY0807 BCEAB459-17|Sigara_scotti|Germany|BOLD:ACY0807 BCEAB026-16|Sigara_scotti|Germany|BOLD:ACY0807 BCEAB495-17|Sigara_scotti|Germany|BOLD:ACY0807 BCEAB456-17|Sigara_scotti|Germany|BOLD:ACY0807 BCEAB025-16|Sigara_scotti|Germany|BOLD:ACY0807 BCEAB458-17|Sigara_scotti|Germany|BOLD:ACY0807 BCEAB461-17|Sigara_scotti|Germany|BOLD:ACY0807…
Subset[ 32 ] n: 13 ;id: ZMBN1846-21|Sigara|Norway|BOLD:ABA5309 HEMFI019-12|Sigara_limitata|Finland|BOLD:ABA5309 HEMFI018-12|Sigara_semistriata|Finland|BOLD:ABA5309 BCEAB067-16|Sigara_semistriata|Germany|BOLD:ABA5309 BCEAB574-17|Sigara_semistriata|Germany|BOLD:ABA5309 BCEAB013-16|Sigara_semistriata|Germany|BOLD:ABA5309 BCEAB076-16|Sigara_semistriata|Germany|BOLD:ABA5309 BCEAB630-17|Sigara_limitata…
Subset[ 33 ] n: 10 ;id: BCEAB437-16|Paracorixa_concinna|Germany|BOLD:ABV3365 BCEAB438-16|Paracorixa_concinna|Germany|BOLD:ABV3365 BCEAB440-16|Paracorixa_concinna|Germany|BOLD:ABV3365 BCEAB441-16|Paracorixa_concinna|Germany|BOLD:ABV3365 BCEAB538-17|Paracorixa_concinna|Germany|BOLD:ABV3365 BCEAB539-17|Paracorixa_concinna|Germany|BOLD:ABV3365 BCEAB351-16|Paracorixa_concinna|Germany|BOLD:ABV3365 FBAQ…
Subset[ 34 ] n: 2 ;id: BCEAB540-17|Paracorixa_concinna|Germany|BOLD:ADG5371 IBIHP184-21|Paracorixa_concinna|Portugal|BOLD:ADG5371
Subset[ 35 ] n: 54 ;id: DTNHM3782-21|Sigara_dorsalis|United_Kingdom|BOLD:AAJ6688 ANBIO192-19|Sigara|United_Kingdom|BOLD:AAJ6688 ZMBN1775-20|Sigara_striata|Norway|BOLD:AAJ6688 ANBIO191-19|Sigara|United_Kingdom|BOLD:AAJ6688 BCEAB455-17|Sigara_striata|Germany|BOLD:AAJ6688 BCEAB421-16|Sigara_striata|Austria|BOLD:AAJ6688 BCEAB499-17|Sigara_striata|Germany|BOLD:AAJ6688 BCEAB517-17|Sigara_striata|German…
Subset[ 36 ] n: 1 ;id: FBAQU1298-12|Sigara_sp.|Germany|BOLD:ACB1949
Subset[ 37 ] n: 4 ;id: COLFH2024-16|Sigara_hellensii|Finland|BOLD:ADF0579 COLFH1984-16|Sigara_hellensii|Finland|BOLD:ADF0579 COLFH2025-16|Sigara_hellensii|Finland|BOLD:ADF0579 COLFH2026-16|Sigara_hellensii|Finland|BOLD:ADF0579
Subset[ 38 ] n: 1 ;id: BCEAB521-17|Sigara_hellensii|Germany|BOLD:ACT7694
Subset[ 39 ] n: 1 ;id: BCEAB614-17|Sigara_hellensii|Germany|BOLD:ADH9592
Subset[ 40 ] n: 8 ;id: FIFLY354-14|Glaenocorisa_cavifrons|Norway|BOLD:ABX4248 COLFH2019-16|Glaenocorisa_cavifrons|Finland|BOLD:ABX4248 FBHET926-12|Glaenocorisa_propinqua|Germany|BOLD:ABX4248 FBHET927-12|Glaenocorisa_propinqua|Germany|BOLD:ABX4248 BCEAB337-16|Glaenocorisa_propinqua|Germany|BOLD:ABX4248 BCEAB338-16|Glaenocorisa_propinqua|Germany|BOLD:ABX4248 FBHET929-12|Glaenocorisa_propinqua|Germa…
Subset[ 41 ] n: 1 ;id: HETFI024-11|Callicorixa_producta|Norway|BOLD:AAN4775
Subset[ 42 ] n: 4 ;id: HETFI017-11|Callicorixa_producta|Norway|BOLD:ABA4077 HEMFI006-12|Callicorixa_wollastoni|Finland|BOLD:ABA4077 HEMFI012-12|Callicorixa_wollastoni|Finland|BOLD:ABA4077 VARPL008-21|Callicorixa_praeusta|Poland|BOLD:ADG5654
Subset[ 43 ] n: 33 ;id: DTNHM778-21|Callicorixa_praeusta|United_Kingdom|BOLD:AAK1938 COLFH1901-16|Callicorixa_praeusta|Finland|BOLD:AAK1938 COLFH1902-16|Callicorixa_praeusta|Finland|BOLD:AAK1938 COLFH1903-16|Callicorixa_praeusta|Finland|BOLD:AAK1938 HEMFI003-12|Callicorixa_praeusta|Finland|BOLD:AAK1938 BCEAB102-16|Callicorixa_praeusta|Germany|BOLD:AAK1938 BCEAB104-16|Callicorixa_praeusta|Germany|…
Subset[ 44 ] n: 9 ;id: COLFH2022-16|Arctocorisa_germari|Finland|BOLD:ACY1261 COLFH2023-16|Arctocorisa_germari|Finland|BOLD:ACY1261 BCEAB518-17|Arctocorisa_carinata|Austria|BOLD:ACY1261 COLFH2013-16|Arctocorisa_carinata|Finland|BOLD:ACY1261 COLFH2015-16|Arctocorisa_carinata|Finland|BOLD:ACY1261 BCEAB341-16|Arctocorisa_carinata|Austria|BOLD:ACY1261 BCEAB340-16|Arctocorisa_carinata|Austria|BOLD:AAJ7…
Subset[ 45 ] n: 2 ;id: MOHET247-21|Sigara_scripta|Montenegro|BOLD:AEI1642 MOHET246-21|Sigara_scripta|Montenegro|BOLD:AEI1642
Subset[ 46 ] n: 15 ;id: BCEAB425-16|Sigara_lateralis|Germany|BOLD:AAJ6697 GBMIX2957-16|Sigara_lateralis|Germany|BOLD:AAJ6697 DTNHM3561-21|Sigara_lateralis|United_Kingdom|BOLD:AAJ6697 BCEAB462-17|Sigara_lateralis|Germany|BOLD:AAJ6697 BCEAB027-16|Sigara_lateralis|Germany|BOLD:AAJ6697 BCEAB029-16|Sigara_lateralis|Germany|BOLD:AAJ6697 BCEAB030-16|Sigara_lateralis|Germany|BOLD:AAJ6697 BCEAB031-16|Siga…
Subset[ 47 ] n: 20 ;id: ZMBN1758-20|Sigara_nigrolineata|Norway|BOLD:ACB1978 BCEAB607-17|Sigara_nigrolineata|Germany|BOLD:ACB1978 BCEAB005-16|Sigara_nigrolineata|Germany|BOLD:ACB1978 BCEAB006-16|Sigara_nigrolineata|Germany|BOLD:ACB1978 BCEAB007-16|Sigara_nigrolineata|Germany|BOLD:ACB1978 BCEAB009-16|Sigara_nigrolineata|Germany|BOLD:ACB1978 FBAQU1297-12|Sigara_nigrolineata|Germany|BOLD:ACB1978 IBIH…
Subset[ 48 ] n: 5 ;id: BCEAB500-17|Sigara_stagnalis|Germany|BOLD:ACY0713 BCEAB002-16|Sigara_stagnalis|Germany|BOLD:ACY0713 BCEAB003-16|Sigara_stagnalis|Germany|BOLD:ACY0713 BCEAB334-16|Sigara_stagnalis|Germany|BOLD:ACY0713 BCEAB501-17|Sigara_stagnalis|Germany|BOLD:ACY0713
Subset[ 49 ] n: 25 ;id: DTNHM2683-21|Corixa_panzeri|United_Kingdom|BOLD:ACB1799 GBMIX2942-16|Corixa_punctata|Spain|BOLD:ACB1799 GBMIX2949-16|Corixa_punctata|Spain|BOLD:ACB1799 BCEAB112-16|Corixa_punctata|Germany|BOLD:ACB1799 GBMIX2943-16|Corixa_punctata|Spain|BOLD:ACB1799 GBMIX2954-16|Corixa_punctata|Spain|BOLD:ACB1799 BCEAB113-16|Corixa_punctata|Germany|BOLD:ACB1799 BCEAB114-16|Corixa_punctata|G…
Subset[ 50 ] n: 3 ;id: HEMFI008-12|Corixa_dentipes|Finland|BOLD:ABX0387 PLSW192-21|Corixa_dentipes|Poland|BOLD:ABX0387 PLSW191-21|Corixa_dentipes|Poland|BOLD:ABX0387
Subset[ 51 ] n: 13 ;id: BCEAB556-17|Corixa_affinis|Greece|BOLD:ACY0615 BCEAB557-17|Corixa_affinis|Greece|BOLD:ACY0615 BCEAB559-17|Corixa_affinis|Greece|BOLD:ACY0615 IBIHP133-20|Corixa_affinis|Portugal|BOLD:ACY0615 BCEAB558-17|Corixa_affinis|Greece|BOLD:ACY0615 BCEAB322-16|Corixa_affinis|Germany|BOLD:ACY0615 BCEAB323-16|Corixa_affinis|Germany|BOLD:ACY0615 BCEAB324-16|Corixa_affinis|Germany|BOLD:AC…
Subset[ 52 ] n: 2 ;id: BCEAB330-16|Corixa_panzeri|Germany|BOLD:ACX9506 BCEAB331-16|Corixa_panzeri|Germany|BOLD:ACX9506
Subset[ 53 ] n: 45 ;id: DTNHM3520-21|Hesperocorixa_sahlbergi|United_Kingdom|BOLD:AAN0795 BCEAB318-16|Hesperocorixa_sahlbergi|Germany|BOLD:AAN0795 BCEAB319-16|Hesperocorixa_sahlbergi|Germany|BOLD:AAN0795 BCEAB137-16|Hesperocorixa_sahlbergi|Germany|BOLD:AAN0795 BCEAB138-16|Hesperocorixa_sahlbergi|Germany|BOLD:AAN0795 BCEAB148-16|Hesperocorixa_sahlbergi|Germany|BOLD:AAN0795 BCEAB151-16|Hesperocorixa…
Subset[ 54 ] n: 16 ;id: MOHET260-21|Hesperocorixa_sahlbergi|Montenegro|BOLD:AEF2957 MOHET261-21|Hesperocorixa_sahlbergi|Montenegro|BOLD:AEF2957 MOHET224-21|Hesperocorixa_sahlbergi|Montenegro|BOLD:AEF2957 MOHET225-21|Hesperocorixa_sahlbergi|Montenegro|BOLD:AEF2957 MOHET226-21|Hesperocorixa_sahlbergi|Montenegro|BOLD:AEF2957 MOHET237-21|Hesperocorixa_sahlbergi|Montenegro|BOLD:AEF2957 TRSKA3608-20|He…
Subset[ 55 ] n: 2 ;id: SICOF109-19|Parasigara_perdubia|Spain|BOLD:AEC6783 SICOF108-19|Parasigara_perdubia|Spain|BOLD:AEC6783
Subset[ 56 ] n: 16 ;id: HEMFI009-12|Hesperocorixa_castanea|Finland|BOLD:ABX0447 BCEAB118-16|Hesperocorixa_castanea|Germany|BOLD:ABX0447 BCEAB119-16|Hesperocorixa_castanea|Germany|BOLD:ABX0447 BCEAB120-16|Hesperocorixa_castanea|Germany|BOLD:ABX0447 BCEAB121-16|Hesperocorixa_castanea|Germany|BOLD:ABX0447 BCEAB122-16|Hesperocorixa_castanea|Germany|BOLD:ABX0447 BCEAB123-16|Hesperocorixa_castanea|Germ…
Subset[ 57 ] n: 1 ;id: DTNHM3569-21|Hesperocorixa_moesta|United_Kingdom|BOLD:ACY1096
Subset[ 58 ] n: 15 ;id: HEMFI1202-16|Hesperocorixa_linnaei|Finland|BOLD:ABX0448 HEMFI1204-16|Hesperocorixa_linnaei|Finland|BOLD:ABX0448 HEMFI011-12|Hesperocorixa_linnaei|Finland|BOLD:ABX0448 FBAQU1274-12|Hesperocorixa_linnaei|Germany|BOLD:ABX0448 BCEAB491-17|Hesperocorixa_linnaei|Germany|BOLD:ABX0448 BCEAB492-17|Hesperocorixa_linnaei|Germany|BOLD:ABX0448 BCEAB493-17|Hesperocorixa_linnaei|Germany|…
Subset[ 59 ] n: 7 ;id: ZMBN1966-21|Cymatia_bonsdorffi|Norway|BOLD:ABX0396 PLSW109-20|Cymatia_bonsdorffi|Poland|BOLD:ABX0396 BCEAB077-16|Cymatia_bonsdorffii|Germany|BOLD:ABX0396 BCEAB078-16|Cymatia_bonsdorffii|Germany|BOLD:ABX0396 BCEAB498-17|Cymatia_bonsdorffii|Germany|BOLD:ABX0396 BCEAB099-16|Cymatia_bonsdorffii|Germany|BOLD:ABX0396 HEMFI001-12|Cymatia_bonsdorffii|Finland|BOLD:ABX0396
Subset[ 60 ] n: 1 ;id: ZMBN1725-20|Cymatia_bonsdorffi|Norway|BOLD:ABX0396
Subset[ 61 ] n: 2 ;id: BCEAB446-16|Cymatia_coleoptrata|Germany|BOLD:ADD1561 BCEAB447-16|Cymatia_coleoptrata|Germany|BOLD:ADD1561
Subset[ 62 ] n: 1 ;id: FBAQU1269-12|Cymatia_rogenhoferi|Germany|BOLD:ACB2132
Subset[ 63 ] n: 25 ;id: PLHET013-21|Ilyocoris_cimicoides|Poland|BOLD:AAF2590 BCEAB158-16|Ilyocoris_cimicoides|Germany|BOLD:AAF2590 BCEAB160-16|Ilyocoris_cimicoides|Germany|BOLD:AAF2590 BCEAB161-16|Ilyocoris_cimicoides|Germany|BOLD:AAF2590 FBAQU014-09|Ilyocoris_cimicoides|Germany|BOLD:AAF2590 PLHET012-21|Ilyocoris_cimicoides|Poland|BOLD:AAF2590 BCEAB619-17|Ilyocoris_cimicoides|Germany|BOLD:AAF2590…
Subset[ 64 ] n: 30 ;id: PLHET010-21|Ranatra_linearis|Poland|BOLD:AAL1328 BCEAB543-17|Ranatra_linearis|Austria|BOLD:AAL1328 BCEAB520-17|Ranatra_linearis|Germany|BOLD:AAL1328 BCEAB565-17|Ranatra_linearis|Germany|BOLD:AAL1328 BCEAB450-17|Ranatra_linearis|Germany|BOLD:AAL1328 BCEAB566-17|Ranatra_linearis|Germany|BOLD:AAL1328 PLSW158-20|Ranatra_linearis|Poland|BOLD:AAL1328 PLHET014-21|Ranatra_linearis…
Subset[ 65 ] n: 13 ;id: PLHET015-21|Nepa_cinerea|Poland|BOLD:AAK8359 GBMIX2966-16|Nepa_cinerea|Germany|BOLD:AAK8359 GBMIX2969-16|Nepa_cinerea|Germany|BOLD:AAK8359 BCEAB541-17|Nepa_cinerea|Germany|BOLD:AAK8359 BCEAB448-17|Nepa_cinerea|Germany|BOLD:AAK8359 BCEAB364-16|Nepa_cinerea|Germany|BOLD:AAK8359 BCEAB365-16|Nepa_cinerea|Germany|BOLD:AAK8359 BCEAB366-16|Nepa_cinerea|Germany|BOLD:AAK8359 FBAQU2…
Subset[ 66 ] n: 5 ;id: MOHET033-20|Nepa_cinerea|Montenegro|BOLD:AEH5788 MOHET134-20|Nepa_cinerea|Montenegro|BOLD:AEH5788 MOHET178-21|Nepa_cinerea|Montenegro|BOLD:AEH5788 COLHH1728-18|Nepa_cinerea|Norway|BOLD:ADP8747 COLHH1727-18|Nepa_cinerea|Norway|BOLD:ADP8747
Subset[ 67 ] n: 3 ;id: IBIHP041-20|Nepa_cinerea|Portugal|BOLD:AEC3215 IBIHP045-20|Nepa_cinerea|Portugal|BOLD:AEC3215 IBIHP044-20|Nepa_cinerea|Portugal|BOLD:AEC3215
Subset[ 68 ] n: 4 ;id: XJDQD399-18|Nepa_cinerea|China|BOLD:ADL0058 XJDQD398-18|Nepa_cinerea|China|BOLD:ADL0058 XJDQD397-18|Nepa_cinerea|China|BOLD:ADL0058 XJDQD396-18|Nepa_cinerea|China|BOLD:ADL0058
Subset[ 69 ] n: 4 ;id: COLFH2036-16|Micronecta_minutissima|Finland|BOLD:AAK6480 FBAQU1283-12|Micronecta_griseola|Germany|BOLD:AAK6480 FBAQU001-09|Micronecta_griseola|Germany|BOLD:AAK6480 COLFH2041-16|Micronecta_minutissima|Finland|BOLD:AAK6480
Subset[ 70 ] n: 8 ;id: COLFH2040-16|Micronecta_poweri|Finland|BOLD:AEU4998 COLFH2045-16|Micronecta_poweri|Finland|BOLD:AEU4998 FBAQU1284-12|Micronecta_poweri|Germany|BOLD:ACB1970 BCEAB629-17|Micronecta_poweri|Germany|BOLD:AET2405 MOHET245-21|Micronecta_poweri|Montenegro|BOLD:AET2410 MOHET135-20|Micronecta_poweri|Montenegro|BOLD:AET2410 MOHET045-20|Micronecta_poweri|Montenegro|BOLD:AET2410 MOHET04…
Subset[ 71 ] n: 6 ;id: BCEAB359-16|Micronecta_scholtzi|Germany|BOLD:AAK6479 BCEAB363-16|Micronecta_scholtzi|Germany|BOLD:AAK6479 BCEAB360-16|Micronecta_scholtzi|Germany|BOLD:AAK6479 BCEAB361-16|Micronecta_scholtzi|Germany|BOLD:AAK6479 BCEAB362-16|Micronecta_scholtzi|Germany|BOLD:AAK6479 FBAQU077-09|Micronecta_scholtzi|Germany|BOLD:AAK6479
Subset[ 72 ] n: 13 ;id: MOHET129-20|Micronecta_pusilla|Montenegro|BOLD:AEG9578 MOHET128-20|Micronecta_pusilla|Montenegro|BOLD:AEG9578 MOHET204-21|Micronecta_pusilla|Montenegro|BOLD:AEG9578 MOHET126-20|Micronecta_pusilla|Montenegro|BOLD:AEG9578 MOHET210-21|Micronecta_pusilla|Montenegro|BOLD:AEG9578 MOHET211-21|Micronecta_pusilla|Montenegro|BOLD:AEG9578 MOHET209-21|Micronecta_pusilla|Montenegro|BOL…
Subset[ 73 ] n: 13 ;id: FBUK028-21|Hebrus_ruficeps|United_Kingdom|BOLD:AAI6967 ZMBN1881-21|Hebrus_ruficeps|Norway|BOLD:AAI6967 BCEAB167-16|Hebrus_ruficeps|Germany|BOLD:AAI6967 BCEAB168-16|Hebrus_ruficeps|Germany|BOLD:AAI6967 BCEAB169-16|Hebrus_ruficeps|Germany|BOLD:AAI6967 BCEAB170-16|Hebrus_ruficeps|Germany|BOLD:AAI6967 BCEAB171-16|Hebrus_ruficeps|Germany|BOLD:AAI6967 FBAQU096-09|Hebrus_ruficeps…
Subset[ 74 ] n: 1 ;id: COLFH2035-16|Hebrus_pusillus|Finland|BOLD:ADF2006
Subset[ 75 ] n: 3 ;id: FBAQU703-10|Hebrus_pusillus|Germany|BOLD:AAN0981 FBHET114-11|Hebrus_pusillus|Germany|BOLD:AAN0981 GBMIN68656-17|Hebrus_sp._AC-2016|France|BOLD:AAN0981
Subset[ 76 ] n: 21 ;id: GBMHH20162-19|Mesovelia_furcata|France|BOLD:AAN2451 COLFH2028-16|Mesovelia_furcata|Finland|BOLD:AAN2451 COLFH1990-16|Mesovelia_furcata|Finland|BOLD:AAN2451 COLFH1991-16|Mesovelia_furcata|Finland|BOLD:AAN2451 BCEAB453-17|Mesovelia_furcata|Germany|BOLD:AAN2451 BCEAB291-16|Mesovelia_furcata|Germany|BOLD:AAN2451 BCEAB295-16|Mesovelia_furcata|Germany|BOLD:AAN2451 BCEAB298-16|Me…
Subset[ 77 ] n: 4 ;id: BCEAB419-16|Mesovelia_vittigera|Greece|BOLD:ACD4048 BCEAB536-17|Mesovelia_vittigera|Greece|BOLD:ACD4048 BCEAB537-17|Mesovelia_vittigera|Greece|BOLD:ACD4048 BCEAB418-16|Mesovelia_vittigera|Greece|BOLD:ACD4048
Subset[ 78 ] n: 1 ;id: ZMBN044-15|Hydrometra_stagnorum|Norway|BOLD:ACX7898
Subset[ 79 ] n: 7 ;id: MOHET059-20|Hydrometra_stagnorum|Montenegro|BOLD:AEC2693 MOHET234-21|Hydrometra_stagnorum|Montenegro|BOLD:AEC2693 MOHET060-20|Hydrometra_stagnorum|Montenegro|BOLD:AEC2693 MOHET229-21|Hydrometra_stagnorum|Montenegro|BOLD:AEC2693 MOHET230-21|Hydrometra_stagnorum|Montenegro|BOLD:AEC2693 MOHET231-21|Hydrometra_stagnorum|Montenegro|BOLD:AEC2693 IBIHP043-20|Hydrometra_stagnorum|P…
Subset[ 80 ] n: 28 ;id: MOHET252-21|Hydrometra_stagnorum|Montenegro|BOLD:AAK5632 BCEAB496-17|Hydrometra_stagnorum|Germany|BOLD:AAK5632 BCEAB302-16|Hydrometra_stagnorum|Germany|BOLD:AAK5632 BCEAB303-16|Hydrometra_stagnorum|Germany|BOLD:AAK5632 BCEAB304-16|Hydrometra_stagnorum|Germany|BOLD:AAK5632 BCEAB305-16|Hydrometra_stagnorum|Germany|BOLD:AAK5632 BCEAB307-16|Hydrometra_stagnorum|Germany|BOLD:AA…
Subset[ 81 ] n: 11 ;id: HEMFI118-15|Hydrometra_gracilenta|Finland|BOLD:AAN0857 HEMFI117-15|Hydrometra_gracilenta|Finland|BOLD:AAN0857 FBAQU1519-13|Hydrometra_gracilenta|Germany|BOLD:AAN0857 FBAQU1276-12|Hydrometra_gracilenta|Germany|BOLD:AAN0857 FBHET068-11|Hydrometra_gracilenta|Germany|BOLD:AAN0857 FBAQU705-10|Hydrometra_gracilenta|Germany|BOLD:AAN0857 FBHET069-11|Hydrometra_gracilenta|Germany|B…

## Sheet: Table S3_mPTP
Supplementary information to:
DNA barcode-based survey documents underestimated diversity and intricate phylogeographic patterns of aquatic Heteroptera in an endangered Balkan biodiversity hotspot: ancient Lake Skadar basin
Tomasz Rewicz, Grzegorz Tończyk, Łukasz Trębicki, Piotr Gadawski, Tomasz Mamos, Vladimir Pešić, Andrzej Zawal, Michał Grabowski
Table S3 Results of the mPTP delimitation
Null-model score: 1605.428508
Best score for multi coalescent rate: 1605.428508
Number of delimited species: 65
Species 1:
IBIHP104-20_Naucoris_maculatus_Portugal_BOLD_AEE8147
Species 2:
DTNHM3567-21_Plea_minutissima_United_Kingdom_BOLD_ACY0868
BCEAB413-16_Plea_minutissima_Germany_BOLD_ACY0868
BCEAB377-16_Plea_minutissima_Germany_BOLD_ACY0868
BCEAB375-16_Plea_minutissima_Germany_BOLD_ACY0868
BCEAB475-17_Plea_minutissima_Germany_BOLD_ACY0868
BCEAB476-17_Plea_minutissima_Germany_BOLD_ACY0868
BCEAB478-17_Plea_minutissima_Germany_BOLD_ACY0868
BCEAB485-17_Plea_minutissima_Germany_BOLD_ACY0868
BCEAB505-17_Plea_minutissima_Germany_BOLD_ACY0868
Species 3:
COLFH2033-16_Plea_minutissima_Finland_BOLD_AAF3832
MOHET144-20_Plea_minutissima_Albania_BOLD_AAF3832
MOHET145-20_Plea_minutissima_Albania_BOLD_AAF3832
BCEAB444-16_Plea_minutissima_Germany_BOLD_AAF3832
COLFH2032-16_Plea_minutissima_Finland_BOLD_AAF3832
MOHET146-20_Plea_minutissima_Albania_BOLD_AAF3832
COLFH2034-16_Plea_minutissima_Finland_BOLD_AAF3832
BCEAB522-17_Plea_minutissima_Germany_BOLD_AAF3832
BCEAB564-17_Plea_minutissima_Germany_BOLD_AAF3832
BCEAB524-17_Plea_minutissima_Germany_BOLD_AAF3832
BCEAB563-17_Plea_minutissima_Germany_BOLD_AAF3832
FBAQU022-09_Plea_minutissima_Germany_BOLD_AAF3832
BCEAB523-17_Plea_minutissima_Germany_BOLD_AAF3832
BCEAB414-16_Plea_minutissima_Germany_BOLD_AAF3832
BCEAB416-16_Plea_minutissima_Germany_BOLD_AAF3832
Species 4:
DTNHM2305-21_Notonecta_glauca_United_Kingdom_BOLD_AAK4442
BCEAB382-16_Notonecta_glauca_Germany_BOLD_AAK4442
BCEAB045-16_Notonecta_glauca_Germany_BOLD_AAK4442
BCEAB463-17_Notonecta_glauca_Germany_BOLD_AAK4442
BCEAB464-17_Notonecta_glauca_Germany_BOLD_AAK4442
MOHET040-20_Notonecta_glauca_Montenegro_BOLD_AAK4442
PLSW111-20_Notonecta_glauca_Poland_BOLD_AAK4442
BCEAB038-16_Notonecta_glauca_Germany_BOLD_AAK4442
MOHET039-20_Notonecta_glauca_Montenegro_BOLD_AAK4442
BCEAB037-16_Notonecta_glauca_Germany_BOLD_AAK4442
MOHET179-21_Notonecta_glauca_Montenegro_BOLD_AAK4442
PLHET029-21_Notonecta_glauca_Poland_BOLD_AAK4442
BCEAB466-17_Notonecta_glauca_Germany_BOLD_AAK4442
BCEAB546-17_Notonecta_glauca_Austria_BOLD_AAK4442
BCEAB412-16_Notonecta_glauca_Germany_BOLD_AAK4442
MOHET034-20_Notonecta_glauca_Montenegro_BOLD_AAK4442
BCEAB052-16_Notonecta_glauca_Germany_BOLD_AAK4442
BCEAB410-16_Notonecta_glauca_Germany_BOLD_AAK4442
PLSW107-20_Notonecta_glauca_Poland_BOLD_AAK4442
BCEAB047-16_Notonecta_glauca_Germany_BOLD_AAK4442
BCEAB409-16_Notonecta_viridis_Germany_BOLD_ABV0133
BCEAB443-16_Notonecta_viridis_Germany_BOLD_ABV0133
BCEAB510-17_Notonecta_viridis_Germany_BOLD_ABV0133
BCEAB580-17_Notonecta_viridis_Germany_BOLD_ABV0133
FBAQU1290-12_Notonecta_viridis_Germany_BOLD_ABV0133
BCEAB378-16_Notonecta_viridis_Germany_BOLD_ABV0133
BCEAB379-16_Notonecta_viridis_Germany_BOLD_ABV0133
BCEAB442-16_Notonecta_viridis_Germany_BOLD_ABV0133
FBAQU1289-12_Notonecta_viridis_Germany_BOLD_ABV0133
BCEAB062-16_Notonecta_viridis_Germany_BOLD_ABV0133
MOHET061-20_Notonecta_viridis_Montenegro_BOLD_ABV0133
MOHET105-20_Notonecta_glauca_Albania_BOLD_AAK4442
PLSW110-20_Notonecta_glauca_Poland_BOLD_AAK4442
BCEAB465-17_Notonecta_glauca_Germany_BOLD_AAK4442
BCEAB035-16_Notonecta_glauca_Germany_BOLD_AAK4442
BCEAB041-16_Notonecta_glauca_Germany_BOLD_AAK4442
FBAQU028-09_Notonecta_glauca_Germany_BOLD_AAK4442
BCEAB617-17_Notonecta_glauca_Germany_BOLD_AAK4442
BCEAB053-16_Notonecta_glauca_Germany_BOLD_AAK4442
BCEAB036-16_Notonecta_glauca_Germany_BOLD_AAK4442
FBHET1045-12_Notonecta_glauca_Germany_BOLD_AAK4442
BCEAB046-16_Notonecta_glauca_Germany_BOLD_AAK4442
BCEAB380-16_Notonecta_glauca_Germany_BOLD_AAK4442
BCEAB467-17_Notonecta_glauca_Germany_BOLD_AAK4442
BCEAB610-17_Notonecta_glauca_Germany_BOLD_AAK4442
BCEAB042-16_Notonecta_glauca_Germany_BOLD_AAK4442
BCEAB381-16_Notonecta_glauca_Germany_BOLD_AAK4442
BCEAB044-16_Notonecta_glauca_Germany_BOLD_AAK4442
BCEAB040-16_Notonecta_glauca_Germany_BOLD_AAK4442
BCEAB039-16_Notonecta_glauca_Germany_BOLD_AAK4442
BCEAB509-17_Notonecta_glauca_Germany_BOLD_AAK4442
BCEAB544-17_Notonecta_glauca_Austria_BOLD_AAK4442
FBAQU708-10_Notonecta_glauca_Germany_BOLD_AAK4442
OHRBA217-22_Notonecta_glauca_Macedonia_BOLD_AAK4442
BCEAB043-16_Notonecta_glauca_Germany_BOLD_AAK4442
PLHET028-21_Notonecta_glauca_Poland_BOLD_AAK4442
MOHET062-20_Notonecta_glauca_Montenegro_BOLD_AAK4442
BCEAB508-17_Notonecta_glauca_Germany_BOLD_AAK4442
MOHET098-20_Notonecta_glauca_Albania_BOLD_AAK4442
GBMIX2940-16_Notonecta_glauca_Spain_BOLD_AAK4442
GBMIX2952-16_Notonecta_glauca_Spain_BOLD_AAK4442
GBMIX2945-16_Notonecta_glauca_Spain_BOLD_AAK4442
GBMIX2967-16_Notonecta_glauca_Germany_BOLD_AAK4442
GBMIX2950-16_Notonecta_glauca_Spain_BOLD_AAK4442
DTNHM3562-21_Notonecta_obliqua_United_Kingdom_BOLD_AAK4442
BCEAB060-16_Notonecta_obliqua_Germany_BOLD_AAK4442
BCEAB411-16_Notonecta_obliqua_Germany_BOLD_AAK4442
BCEAB604-17_Notonecta_obliqua_Germany_BOLD_AAK4442
BCEAB057-16_Notonecta_obliqua_Germany_BOLD_AAK4442
BCEAB055-16_Notonecta_obliqua_Germany_BOLD_AAK4442
BCEAB497-17_Notonecta_obliqua_Germany_BOLD_AAK4442
BCEAB417-16_Notonecta_obliqua_Germany_BOLD_AAK4442
BCEAB474-17_Notonecta_obliqua_Germany_BOLD_AAK4442
BCEAB056-16_Notonecta_obliqua_Germany_BOLD_AAK4442
Species 5:
COLFH2047-16_Notonecta_reuteri_Finland_BOLD_ACE8526
FBHET1043-12_Notonecta_reuteri_Germany_BOLD_ACE8526
FBHET1039-12_Notonecta_reuteri_Germany_BOLD_ACE8526
FBHET946-12_Notonecta_reuteri_Germany_BOLD_ACE8526
BCEAB578-17_Notonecta_reuteri_Germany_BOLD_ACE8526
FBHET1042-12_Notonecta_reuteri_Germany_BOLD_ACE8526
PLSW170-20_Notonecta_reuteri_Poland_BOLD_ACE8526
PLSW149-20_Notonecta_reuteri_Poland_BOLD_ACE8526
PLSW171-20_Notonecta_reuteri_Poland_BOLD_ACE8526
LEFIJ7743-18_Notonecta_lutea_Finland_BOLD_AAN1701
BCEAB469-17_Notonecta_lutea_Germany_BOLD_AAN1701
LEFIJ7744-18_Notonecta_lutea_Finland_BOLD_AAN1701
FBHET1040-12_Notonecta_lutea_Germany_BOLD_AAN1701
FBAQU709-10_Notonecta_lutea_Germany_BOLD_AAN1701
FBAQU1287-12_Notonecta_lutea_Germany_BOLD_AAN1701
FBHET1036-12_Notonecta_lutea_Germany_BOLD_AAN1701
BCEAB468-17_Notonecta_lutea_Germany_BOLD_AAN1701
FBHET948-12_Notonecta_lutea_Germany_BOLD_AAN1701
FBHET1035-12_Notonecta_lutea_Germany_BOLD_AAN1701
BCEAB470-17_Notonecta_lutea_Germany_BOLD_AAN1701
BCEAB471-17_Notonecta_lutea_Germany_BOLD_AAN1701
GBMIX2972-16_Notonecta_lutea_Poland_BOLD_AAN1701
FBHET1038-12_Notonecta_lutea_Germany_BOLD_AAN1701
BCEAB579-17_Notonecta_lutea_Germany_BOLD_AAN1701
BCEAB472-17_Notonecta_lutea_Germany_BOLD_AAN1701
BCEAB473-17_Notonecta_lutea_Germany_BOLD_AAN1701
FBHET1037-12_Notonecta_lutea_Germany_BOLD_AAN1701
FBHET947-12_Notonecta_lutea_Germany_BOLD_AAN1701
BCEAB049-16_Notonecta_lutea_Germany_BOLD_AAN1701
Species 6:
MOHET248-21_Notonecta_maculata_Albania_BOLD_AEF8405
MOHET251-21_Notonecta_maculata_Albania_BOLD_AEF8405
MOHET063-20_Notonecta_maculata_Montenegro_BOLD_AEF8405
MOHET064-20_Notonecta_maculata_Montenegro_BOLD_AEF8405
MOHET167-21_Notonecta_maculata_Montenegro_BOLD_AEF8405
MOHET139-20_Notonecta_maculata_Albania_BOLD_AEF8405
MOHET189-21_Notonecta_maculata_Montenegro_BOLD_AEF8405
MOHET138-20_Notonecta_maculata_Albania_BOLD_AEF8405
MOHET137-20_Notonecta_maculata_Albania_BOLD_AEF8405
MOHET243-21_Notonecta_maculata_Montenegro_BOLD_AEF8405
MOHET244-21_Notonecta_maculata_Montenegro_BOLD_AEF8405
MOHET250-21_Notonecta_maculata_Albania_BOLD_AEF8405
MOHET188-21_Notonecta_maculata_Montenegro_BOLD_AEF8405
MOHET050-20_Notonecta_maculata_Montenegro_BOLD_AEF8405
MOHET215-21_Notonecta_maculata_Montenegro_BOLD_AEF8405
MOHET035-20_Notonecta_maculata_Montenegro_BOLD_AEF8405
MOHET249-21_Notonecta_maculata_Albania_BOLD_AEF8405
MOHET036-20_Notonecta_maculata_Montenegro_BOLD_AEF8405
MOHET140-20_Notonecta_maculata_Albania_BOLD_AEH5379
FBAQU710-10_Notonecta_maculata_Germany_BOLD_AAN1703
IBIHP048-20_Notonecta_maculata_Portugal_BOLD_AAN1703
BCEAB545-17_Notonecta_maculata_Austria_BOLD_AAN1703
FBHET668-12_Notonecta_maculata_Germany_BOLD_AAN1703
BCEAB549-17_Notonecta_maculata_Austria_BOLD_AAN1703
IBIHP004-19_Notonecta_maculata_Portugal_BOLD_AAN1703
BCEAB603-17_Notonecta_maculata_Germany_BOLD_AAN1703
BCEAB054-16_Notonecta_maculata_Italy_BOLD_AAN1703
FBAQU1288-12_Notonecta_maculata_Germany_BOLD_AAN1703
BCEAB050-16_Notonecta_maculata_Germany_BOLD_AAN1703
IBIHP007-19_Notonecta_maculata_Portugal_BOLD_AAN1703
IBIHP015-19_Notonecta_maculata_Portugal_BOLD_AAN1703
Species 7:
MOHET256-21_Anisops_sardeus_Montenegro_BOLD_ABV0079
BCEAB525-17_Anisops_sardeus_Greece_BOLD_ABV0079
BCEAB527-17_Anisops_sardeus_Greece_BOLD_ABV0079
BCEAB529-17_Anisops_sardeus_Greece_BOLD_ABV0079
BCEAB528-17_Anisops_sardeus_Greece_BOLD_ABV0079
MOHET133-20_Anisops_sardeus_Montenegro_BOLD_ABV0079
BCEAB526-17_Anisops_sardeus_Greece_BOLD_ABV0079
IBIHP114-20_Anisops_sardeus_Portugal_BOLD_ABV0079
Species 8:
DTNHM2685-21_Sigara_distincta_United_Kingdom_BOLD_AAH9524
BCEAB070-16_Sigara_iactans_Germany_BOLD_AAH9524
BCEAB072-16_Sigara_iactans_Germany_BOLD_AAH9524
PLHET031-21_Sigara_falleni_Poland_BOLD_AAH9524
PLSW138-20_Sigara_falleni_Poland_BOLD_AAH9524
BCEAB355-16_Sigara_falleni_Germany_BOLD_AAH9524
BCEAB069-16_Sigara_iactans_Germany_BOLD_AAH9524
BCEAB074-16_Sigara_iactans_Germany_BOLD_AAH9524
BCEAB383-16_Sigara_falleni_Germany_BOLD_AAH9524
FBAQU016-09_Sigara_falleni_Germany_BOLD_AAH9524
BCEAB021-16_Sigara_iactans_Germany_BOLD_AAH9524
FBAQU1292-12_Sigara_falleni_Germany_BOLD_AAH9524
BCEAB384-16_Sigara_iactans_Germany_BOLD_AAH9524
BCEAB611-17_Sigara_falleni_Germany_BOLD_AAH9524
BCEAB075-16_Sigara_iactans_Germany_BOLD_AAH9524
BCEAB424-16_Sigara_falleni_Germany_BOLD_AAH9524
HEMFI020-12_Sigara_distincta_Finland_BOLD_ABY7152
BCEAB627-17_Sigara_distincta_Germany_BOLD_ABY7152
BCEAB626-17_Sigara_distincta_Germany_BOLD_ABY7152
BCEAB628-17_Sigara_distincta_Germany_BOLD_ABY7152
BCEAB393-16_Sigara_distincta_Germany_BOLD_ABY7152
BCEAB542-17_Sigara_distincta_Germany_BOLD_ABY7152
COLFH1905-16_Sigara_falleni_Finland_BOLD_ABY7152
BCEAB422-16_Sigara_falleni_Germany_BOLD_ABY7152
HEMFI109-15_Sigara_falleni_Finland_BOLD_ABY7152
HEMFI110-15_Sigara_fallenoidea_Finland_BOLD_ABY7152
BCEAB404-16_Sigara_falleni_Germany_BOLD_ABY7152
FBAQU712-10_Sigara_falleni_Germany_BOLD_ABY7152
BCEAB354-16_Sigara_iactans_Germany_BOLD_ABY7152
BCEAB068-16_Sigara_iactans_Germany_BOLD_ABY7152
BCEAB353-16_Sigara_falleni_Germany_BOLD_ABY7152
BCEAB071-16_Sigara_iactans_Germany_BOLD_ABY7152
BCEAB073-16_Sigara_iactans_Germany_BOLD_ABY7152
BCEAB423-16_Sigara_falleni_Germany_BOLD_ABY7152
FBAQU162-09_Sigara_falleni_Germany_BOLD_ABY7152
Species 9:
GBMND50724-21_Sigara_distincta_Spain_BOLD_ABV4484
BCEAB435-16_Sigara_distincta_Germany_BOLD_ABV4484
GBMND50723-21_Sigara_distincta_Spain_BOLD_ABV4484
Species 10:
DTNHM3639-21_Sigara_fossarum_United_Kingdom_BOLD_AAJ6707
HEMFI023-12_Sigara_fossarum_Finland_BOLD_AAJ6707
FBAQU210-09_Sigara_fossarum_Germany_BOLD_AAJ6707
HEMFI022-12_Sigara_fossarum_Finland_BOLD_AAJ6707
FBAQU1293-12_Sigara_fossarum_Germany_BOLD_AAJ6707
Species 11:
BCEAB457-17_Sigara_scotti_Germany_BOLD_ACY0807
BCEAB495-17_Sigara_scotti_Germany_BOLD_ACY0807
BCEAB026-16_Sigara_scotti_Germany_BOLD_ACY0807
BCEAB459-17_Sigara_scotti_Germany_BOLD_ACY0807
BCEAB456-17_Sigara_scotti_Germany_BOLD_ACY0807
BCEAB025-16_Sigara_scotti_Germany_BOLD_ACY0807
BCEAB458-17_Sigara_scotti_Germany_BOLD_ACY0807
BCEAB460-17_Sigara_scotti_Germany_BOLD_ACY0807
BCEAB461-17_Sigara_scotti_Germany_BOLD_ACY0807
BCEAB024-16_Sigara_scotti_Germany_BOLD_ACY0807
Species 12:
COLFH2024-16_Sigara_hellensii_Finland_BOLD_ADF0579
COLFH1984-16_Sigara_hellensii_Finland_BOLD_ADF0579
COLFH2025-16_Sigara_hellensii_Finland_BOLD_ADF0579
COLFH2026-16_Sigara_hellensii_Finland_BOLD_ADF0579
BCEAB521-17_Sigara_hellensii_Germany_BOLD_ACT7694
BCEAB614-17_Sigara_hellensii_Germany_BOLD_ADH9592
Species 13:
FBAQU1298-12_Sigara_sp__Germany_BOLD_ACB1949
Species 14:
BCEAB437-16_Paracorixa_concinna_Germany_BOLD_ABV3365
FBAQU1291-12_Paracorixa_concinna_Germany_BOLD_ABV3365
BCEAB439-16_Paracorixa_concinna_Germany_BOLD_ABV3365
BCEAB351-16_Paracorixa_concinna_Germany_BOLD_ABV3365
BCEAB440-16_Paracorixa_concinna_Germany_BOLD_ABV3365
BCEAB539-17_Paracorixa_concinna_Germany_BOLD_ABV3365
BCEAB436-16_Paracorixa_concinna_Germany_BOLD_ABV3365
BCEAB441-16_Paracorixa_concinna_Germany_BOLD_ABV3365
BCEAB538-17_Paracorixa_concinna_Germany_BOLD_ABV3365
BCEAB438-16_Paracorixa_concinna_Germany_BOLD_ABV3365
BCEAB540-17_Paracorixa_concinna_Germany_BOLD_ADG5371
IBIHP184-21_Paracorixa_concinna_Portugal_BOLD_ADG5371
Species 15:
ZMBN1846-21_Sigara_Norway_BOLD_ABA5309
HEMFI018-12_Sigara_semistriata_Finland_BOLD_ABA5309
BCEAB013-16_Sigara_semistriata_Germany_BOLD_ABA5309
BCEAB076-16_Sigara_semistriata_Germany_BOLD_ABA5309
BCEAB574-17_Sigara_semistriata_Germany_BOLD_ABA5309
BCEAB408-16_Sigara_semistriata_Germany_BOLD_ABA5309
BCEAB630-17_Sigara_limitata_Germany_BOLD_ABA5309
BCEAB067-16_Sigara_semistriata_Germany_BOLD_ABA5309
BCEAB352-16_Sigara_limitata_Germany_BOLD_ABA5309
HEMFI019-12_Sigara_limitata_Finland_BOLD_ABA5309
EUBUG567-11_Sigara_venusta_Germany_BOLD_ABA5309
EUBUG568-11_Sigara_venusta_Germany_BOLD_ABA5309
IBIHP005-19_Sigara_venusta_Portugal_BOLD_ABA5309
Species 16:
DTNHM3782-21_Sigara_dorsalis_United_Kingdom_BOLD_AAJ6688
BCEAB516-17_Sigara_striata_Germany_BOLD_AAJ6688
BCEAB350-16_Sigara_striata_Germany_BOLD_AAJ6688
BCEAB349-16_Sigara_striata_Germany_BOLD_AAJ6688
ANBIO191-19_Sigara_United_Kingdom_BOLD_AAJ6688
ZMBN1775-20_Sigara_striata_Norway_BOLD_AAJ6688
ANBIO192-19_Sigara_United_Kingdom_BOLD_AAJ6688
PGCBG8436-20_Sigara_Montenegro_BOLD_AEW5352
PGCBG8529-20_Sigara_dorsalis_Montenegro_BOLD_AEW5352
PLHET016-21_Sigara_striata_Poland_BOLD_AEW5352
MOHET196-21_Sigara_dorsalis_Montenegro_BOLD_AEW5352
HEMFI013-12_Sigara_striata_Finland_BOLD_AEW5352
PGCBG7605-20_Sigara_dorsalis_Montenegro_BOLD_AEW5352
PGCBG7046-20_Sigara_dorsalis_Montenegro_BOLD_AEW5352
PGCBG7248-20_Sigara_dorsalis_Montenegro_BOLD_AEW5352
PGCBG7244-20_Sigara_dorsalis_Montenegro_BOLD_AEW5352
PGCBG7053-20_Sigara_dorsalis_Montenegro_BOLD_AEW5352
PGCBG8636-20_Sigara_dorsalis_Montenegro_BOLD_AEW5352
PGCBG8435-20_Sigara_dorsalis_Montenegro_BOLD_AEW5352
MOHET114-20_Sigara_dorsalis_Montenegro_BOLD_AEW5352
MOHET202-21_Sigara_dorsalis_Montenegro_BOLD_AEW5352
MOHET195-21_Sigara_dorsalis_Montenegro_BOLD_AEW5352
MOHET185-21_Sigara_dorsalis_Montenegro_BOLD_AEW5352
PGCBG8434-20_Sigara_dorsalis_Montenegro_BOLD_AEW5352
MOHET201-21_Sigara_dorsalis_Montenegro_BOLD_AEW5352
BCEAB622-17_Sigara_dorsalis_Switzerland_BOLD_AEW5352
MOHET259-21_Sigara_dorsalis_Albania_BOLD_AEW5352
MOHET200-21_Sigara_dorsalis_Montenegro_BOLD_AEW5352
MOHET197-21_Sigara_dorsalis_Montenegro_BOLD_AEW5352
MOHET183-21_Sigara_dorsalis_Montenegro_BOLD_AEW5352
PGCBG7249-20_Sigara_dorsalis_Montenegro_BOLD_AEW5352
MOHET193-21_Sigara_dorsalis_Albania_BOLD_AEW5352
TRSKA3606-20_Sigara_dorsalis_Montenegro_BOLD_AEW5352
PGCBG7047-20_Sigara_dorsalis_Montenegro_BOLD_AEW5352
PGCBG8532-20_Sigara_dorsalis_Montenegro_BOLD_AEW5352
MOHET194-21_Sigara_dorsalis_Albania_BOLD_AEW5352
MOHET198-21_Sigara_dorsalis_Montenegro_BOLD_AEW5352
MOHET089-20_Sigara_dorsalis_Montenegro_BOLD_AEW5352
MOHET203-21_Sigara_dorsalis_Montenegro_BOLD_AEW5352
PGCBG8433-20_Sigara_dorsalis_Montenegro_BOLD_AEW5352
MOHET184-21_Sigara_dorsalis_Montenegro_BOLD_AEW5352
MOHET125-20_Sigara_dorsalis_Montenegro_BOLD_AEW5352
PGCBG7054-20_Sigara_dorsalis_Montenegro_BOLD_AEW5352
MOHET162-20_Sigara_dorsalis_Montenegro_BOLD_AEW5352
MOHET214-21_Sigara_dorsalis_Montenegro_BOLD_AEW5352
MOHET182-21_Sigara_dorsalis_Montenegro_BOLD_AEW5352
MOHET199-21_Sigara_dorsalis_Montenegro_BOLD_AEW5352
BCEAB455-17_Sigara_striata_Germany_BOLD_AAJ6688
BCEAB499-17_Sigara_striata_Germany_BOLD_AAJ6688
BCEAB454-17_Sigara_striata_Germany_BOLD_AAJ6688
BCEAB348-16_Sigara_striata_Germany_BOLD_AAJ6688
FBAQU211-09_Sigara_striata_Germany_BOLD_AAJ6688
BCEAB517-17_Sigara_striata_Germany_BOLD_AAJ6688
BCEAB421-16_Sigara_striata_Austria_BOLD_AAJ6688
Species 17:
FIFLY354-14_Glaenocorisa_cavifrons_Norway_BOLD_ABX4248
COLFH2019-16_Glaenocorisa_cavifrons_Finland_BOLD_ABX4248
FBHET926-12_Glaenocorisa_propinqua_Germany_BOLD_ABX4248
BCEAB338-16_Glaenocorisa_propinqua_Germany_BOLD_ABX4248
BCEAB337-16_Glaenocorisa_propinqua_Germany_BOLD_ABX4248
FBHET927-12_Glaenocorisa_propinqua_Germany_BOLD_ABX4248
FBHET929-12_Glaenocorisa_propinqua_Germany_BOLD_ABX4248
BCEAB339-16_Glaenocorisa_propinqua_Germany_BOLD_ABX4248
Species 18:
HETFI024-11_Callicorixa_producta_Norway_BOLD_AAN4775
HETFI017-11_Callicorixa_producta_Norway_BOLD_ABA4077
HEMFI012-12_Callicorixa_wollastoni_Finland_BOLD_ABA4077
HEMFI006-12_Callicorixa_wollastoni_Finland_BOLD_ABA4077
VARPL008-21_Callicorixa_praeusta_Poland_BOLD_ADG5654
DTNHM778-21_Callicorixa_praeusta_United_Kingdom_BOLD_AAK1938
COLFH1901-16_Callicorixa_praeusta_Finland_BOLD_AAK1938
BCEAB109-16_Callicorixa_praeusta_Germany_BOLD_AAK1938
BCEAB107-16_Callicorixa_praeusta_Germany_BOLD_AAK1938
BCEAB102-16_Callicorixa_praeusta_Germany_BOLD_AAK1938
FBAQU203-09_Callicorixa_praeusta_Germany_BOLD_AAK1938
BCEAB106-16_Callicorixa_praeusta_Germany_BOLD_AAK1938
VARPL011-21_Callicorixa_praeusta_Poland_BOLD_AAK1938
BCEAB110-16_Callicorixa_praeusta_Germany_BOLD_AAK1938
BCEAB434-16_Callicorixa_praeusta_Germany_BOLD_AAK1938
BCEAB104-16_Callicorixa_praeusta_Germany_BOLD_AAK1938
VARPL007-21_Callicorixa_praeusta_Poland_BOLD_AAK1938
COLFH1903-16_Callicorixa_praeusta_Finland_BOLD_AAK1938
BCEAB017-16_Callicorixa_praeusta_Germany_BOLD_AAK1938
BCEAB577-17_Callicorixa_praeusta_Germany_BOLD_AAK1938
BCEAB153-16_Callicorixa_praeusta_Germany_BOLD_AAK1938
BCEAB155-16_Callicorixa_praeusta_Germany_BOLD_AAK1938
BCEAB103-16_Callicorixa_praeusta_Germany_BOLD_AAK1938
BCEAB016-16_Callicorixa_praeusta_Germany_BOLD_AAK1938
BCEAB101-16_Callicorixa_praeusta_Germany_BOLD_AAK1938
BCEAB515-17_Callicorixa_praeusta_Germany_BOLD_AAK1938
VARPL009-21_Callicorixa_praeusta_Poland_BOLD_AAK1938
BCEAB105-16_Callicorixa_praeusta_Germany_BOLD_AAK1938
BCEAB335-16_Callicorixa_praeusta_Germany_BOLD_AAK1938
BCEAB108-16_Callicorixa_praeusta_Germany_BOLD_AAK1938
VARPL010-21_Callicorixa_praeusta_Poland_BOLD_AAK1938
GBMIX2958-16_Callicorixa_praeusta_Germany_BOLD_AAK1938
BCEAB100-16_Callicorixa_praeusta_Germany_BOLD_AAK1938
GBMIX2960-16_Callicorixa_praeusta_Germany_BOLD_AAK1938
HEMFI003-12_Callicorixa_praeusta_Finland_BOLD_AAK1938
BCEAB336-16_Callicorixa_praeusta_Germany_BOLD_AAK1938
COLFH1902-16_Callicorixa_praeusta_Finland_BOLD_AAK1938
BCEAB514-17_Callicorixa_praeusta_Germany_BOLD_AAK1938
Species 19:
ZMBN1758-20_Sigara_nigrolineata_Norway_BOLD_ACB1978
FBAQU1297-12_Sigara_nigrolineata_Germany_BOLD_ACB1978
IBIHP116-20_Sigara_nigrolineata_Portugal_BOLD_ACB1978
BCEAB608-17_Sigara_nigrolineata_Germany_BOLD_ACB1978
BCEAB011-16_Sigara_nigrolineata_Germany_BOLD_ACB1978
BCEAB006-16_Sigara_nigrolineata_Germany_BOLD_ACB1978
BCEAB009-16_Sigara_nigrolineata_Germany_BOLD_ACB1978
DTNHM3797-21_Sigara_nigrolineata_United_Kingdom_BOLD_ACB1978
BCEAB007-16_Sigara_nigrolineata_Germany_BOLD_ACB1978
BCEAB343-16_Sigara_nigrolineata_Austria_BOLD_ACB1978
BCEAB005-16_Sigara_nigrolineata_Germany_BOLD_ACB1978
BCEAB607-17_Sigara_nigrolineata_Germany_BOLD_ACB1978
FBAQU1296-12_Sigara_nigrolineata_Germany_BOLD_ACB1978
BCEAB010-16_Sigara_nigrolineata_Germany_BOLD_ACB1978
BCEAB004-16_Sigara_nigrolineata_Germany_BOLD_ACB1978
SBAM007-22_Sigara_nigrolineata_Italy_BOLD_ACB1978
BCEAB344-16_Sigara_nigrolineata_Austria_BOLD_ACB1978
BCEAB347-16_Sigara_nigrolineata_Austria_BOLD_ACB1978
BCEAB346-16_Sigara_nigrolineata_Austria_BOLD_ACB1978
BCEAB345-16_Sigara_nigrolineata_Austria_BOLD_ACB1978
Species 20:
COLFH2022-16_Arctocorisa_germari_Finland_BOLD_ACY1261
COLFH2023-16_Arctocorisa_germari_Finland_BOLD_ACY1261
COLFH2013-16_Arctocorisa_carinata_Finland_BOLD_ACY1261
COLFH2015-16_Arctocorisa_carinata_Finland_BOLD_ACY1261
BCEAB518-17_Arctocorisa_carinata_Austria_BOLD_ACY1261
BCEAB341-16_Arctocorisa_carinata_Austria_BOLD_ACY1261
BCEAB340-16_Arctocorisa_carinata_Austria_BOLD_AAJ7903
BCEAB342-16_Arctocorisa_carinata_Austria_BOLD_AAJ7903
FBAQU307-09_Arctocorisa_carinata_Germany_BOLD_AAJ7903
Species 21:
MOHET247-21_Sigara_scripta_Montenegro_BOLD_AEI1642
MOHET246-21_Sigara_scripta_Montenegro_BOLD_AEI1642
Species 22:
BCEAB425-16_Sigara_lateralis_Germany_BOLD_AAJ6697
BCEAB032-16_Sigara_lateralis_Germany_BOLD_AAJ6697
BCEAB031-16_Sigara_lateralis_Germany_BOLD_AAJ6697
BCEAB029-16_Sigara_lateralis_Germany_BOLD_AAJ6697
BCEAB027-16_Sigara_lateralis_Germany_BOLD_AAJ6697
BCEAB462-17_Sigara_lateralis_Germany_BOLD_AAJ6697
BCEAB030-16_Sigara_lateralis_Germany_BOLD_AAJ6697
BCEAB028-16_Sigara_lateralis_Germany_BOLD_AAJ6697
DTNHM3561-21_Sigara_lateralis_United_Kingdom_BOLD_AAJ6697
GBMIX2957-16_Sigara_lateralis_Germany_BOLD_AAJ6697
FBAQU164-09_Sigara_lateralis_Germany_BOLD_AAJ6697
BCEAB511-17_Sigara_lateralis_Germany_BOLD_AAJ6697
BCEAB533-17_Sigara_lateralis_Greece_BOLD_AAJ6697
BCEAB534-17_Sigara_lateralis_Greece_BOLD_AAJ6697
BCEAB535-17_Sigara_lateralis_Greece_BOLD_AAJ6697
Species 23:
BCEAB500-17_Sigara_stagnalis_Germany_BOLD_ACY0713
BCEAB003-16_Sigara_stagnalis_Germany_BOLD_ACY0713
BCEAB334-16_Sigara_stagnalis_Germany_BOLD_ACY0713
BCEAB002-16_Sigara_stagnalis_Germany_BOLD_ACY0713
BCEAB501-17_Sigara_stagnalis_Germany_BOLD_ACY0713
Species 24:
DTNHM2683-21_Corixa_panzeri_United_Kingdom_BOLD_ACB1799
GBMIX2942-16_Corixa_punctata_Spain_BOLD_ACB1799
IBIHP187-21_Corixa_punctata_Portugal_BOLD_ACB1799
BCEAB114-16_Corixa_punctata_Germany_BOLD_ACB1799
BCEAB112-16_Corixa_punctata_Germany_BOLD_ACB1799
GBMIX2943-16_Corixa_punctata_Spain_BOLD_ACB1799
BCEAB116-16_Corixa_punctata_Germany_BOLD_ACB1799
PLSW093-20_Corixa_punctata_Poland_BOLD_ACB1799
BCEAB113-16_Corixa_punctata_Germany_BOLD_ACB1799
BCEAB115-16_Corixa_punctata_Germany_BOLD_ACB1799
FBAQU1266-12_Corixa_punctata_Germany_BOLD_ACB1799
GBMIX2954-16_Corixa_punctata_Spain_BOLD_ACB1799
GBMIX2949-16_Corixa_punctata_Spain_BOLD_ACB1799
BCEAB111-16_Corixa_punctata_Germany_BOLD_ACB1799
BCEAB576-17_Corixa_punctata_Germany_BOLD_ACB1799
BCEAB117-16_Corixa_punctata_Germany_BOLD_ACB1799
BCEAB333-16_Corixa_punctata_Germany_BOLD_ACB1799
BCEAB332-16_Corixa_punctata_Germany_BOLD_ACB1799
GBMIX2947-16_Corixa_punctata_Spain_BOLD_ACB1799
GBMIX2941-16_Corixa_punctata_Spain_BOLD_ACB1799
GBMIX2951-16_Corixa_punctata_Spain_BOLD_ACB1799
GBMIX2955-16_Corixa_punctata_Spain_BOLD_ACB1799
GBMIX2953-16_Corixa_punctata_Spain_BOLD_ACB1799
IBIHP192-21_Corixa_punctata_Portugal_BOLD_ACB1799
BCEAB575-17_Corixa_punctata_Germany_BOLD_ACB1799
Species 25:
HEMFI008-12_Corixa_dentipes_Finland_BOLD_ABX0387
PLSW192-21_Corixa_dentipes_Poland_BOLD_ABX0387
PLSW191-21_Corixa_dentipes_Poland_BOLD_ABX0387
Species 26:
BCEAB556-17_Corixa_affinis_Greece_BOLD_ACY0615
BCEAB557-17_Corixa_affinis_Greece_BOLD_ACY0615
IBIHP133-20_Corixa_affinis_Portugal_BOLD_ACY0615
BCEAB559-17_Corixa_affinis_Greece_BOLD_ACY0615
BCEAB322-16_Corixa_affinis_Germany_BOLD_ACY0615
BCEAB325-16_Corixa_affinis_Germany_BOLD_ACY0615
BCEAB327-16_Corixa_affinis_Germany_BOLD_ACY0615
BCEAB324-16_Corixa_affinis_Germany_BOLD_ACY0615
BCEAB328-16_Corixa_affinis_Germany_BOLD_ACY0615
BCEAB326-16_Corixa_affinis_Germany_BOLD_ACY0615
BCEAB329-16_Corixa_affinis_Germany_BOLD_ACY0615
BCEAB323-16_Corixa_affinis_Germany_BOLD_ACY0615
BCEAB558-17_Corixa_affinis_Greece_BOLD_ACY0615
Species 27:
BCEAB330-16_Corixa_panzeri_Germany_BOLD_ACX9506
BCEAB331-16_Corixa_panzeri_Germany_BOLD_ACX9506
Species 28:
DTNHM3520-21_Hesperocorixa_sahlbergi_United_Kingdom_BOLD_AAN0795
MOHET260-21_Hesperocorixa_sahlbergi_Montenegro_BOLD_AEF2957
MOHET224-21_Hesperocorixa_sahlbergi_Montenegro_BOLD_AEF2957
MOHET226-21_Hesperocorixa_sahlbergi_Montenegro_BOLD_AEF2957
MOHET237-21_Hesperocorixa_sahlbergi_Montenegro_BOLD_AEF2957
MOHET225-21_Hesperocorixa_sahlbergi_Montenegro_BOLD_AEF2957
TRSKA3608-20_Hesperocorixa_sahlbergi_Montenegro_BOLD_AEF2957
MOHET118-20_Hesperocorixa_sahlbergi_Montenegro_BOLD_AEF2957
MOHET261-21_Hesperocorixa_sahlbergi_Montenegro_BOLD_AEF2957
MOHET227-21_Hesperocorixa_sahlbergi_Montenegro_BOLD_AEF2957
MOHET122-20_Hesperocorixa_sahlbergi_Montenegro_BOLD_AEF2957
MOHET121-20_Hesperocorixa_sahlbergi_Montenegro_BOLD_AEF2957
MOHET236-21_Hesperocorixa_sahlbergi_Montenegro_BOLD_AEF2957
MOHET119-20_Hesperocorixa_sahlbergi_Montenegro_BOLD_AEF2957
MOHET238-21_Hesperocorixa_sahlbergi_Montenegro_BOLD_AEF2957
TRSKA3609-20_Hesperocorixa_sahlbergi_Montenegro_BOLD_AEF2957
TRSKA3607-20_Hesperocorixa_sahlbergi_Montenegro_BOLD_AEF2957
BCEAB318-16_Hesperocorixa_sahlbergi_Germany_BOLD_AAN0795
BCEAB319-16_Hesperocorixa_sahlbergi_Germany_BOLD_AAN0795
BCEAB135-16_Hesperocorixa_sahlbergi_Germany_BOLD_AAN0795
BCEAB147-16_Hesperocorixa_sahlbergi_Germany_BOLD_AAN0795
BCEAB138-16_Hesperocorixa_sahlbergi_Germany_BOLD_AAN0795
BCEAB151-16_Hesperocorixa_sahlbergi_Germany_BOLD_AAN0795
BCEAB148-16_Hesperocorixa_sahlbergi_Germany_BOLD_AAN0795
BCEAB137-16_Hesperocorixa_sahlbergi_Germany_BOLD_AAN0795
COLFH1904-16_Hesperocorixa_sahlbergi_Finland_BOLD_AAN0795
BCEAB136-16_Hesperocorixa_sahlbergi_Germany_BOLD_AAN0795
BCEAB317-16_Hesperocorixa_sahlbergi_Germany_BOLD_AAN0795
PLSW132-20_Hesperocorixa_sahlbergi_Poland_BOLD_AAN0795
GBMIX2973-16_Hesperocorixa_sahlbergi_Poland_BOLD_AAN0795
BCEAB316-16_Hesperocorixa_sahlbergi_Germany_BOLD_AAN0795
BCEAB140-16_Hesperocorixa_sahlbergi_Germany_BOLD_AAN0795
BCEAB141-16_Hesperocorixa_sahlbergi_Germany_BOLD_AAN0795
BCEAB150-16_Hesperocorixa_sahlbergi_Germany_BOLD_AAN0795
BCEAB142-16_Hesperocorixa_sahlbergi_Germany_BOLD_AAN0795
PLSW133-20_Hesperocorixa_sahlbergi_Poland_BOLD_AAN0795
GBMIX2963-16_Hesperocorixa_sahlbergi_Portugal_BOLD_AAN0795
BCEAB139-16_Hesperocorixa_sahlbergi_Germany_BOLD_AAN0795
BCEAB146-16_Hesperocorixa_sahlbergi_Germany_BOLD_AAN0795
BCEAB152-16_Hesperocorixa_sahlbergi_Germany_BOLD_AAN0795
FBAQU1517-13_Hesperocorixa_sahlbergi_Germany_BOLD_AAN0795
BCEAB133-16_Hesperocorixa_sahlbergi_Germany_BOLD_AAN0795
BCEAB143-16_Hesperocorixa_sahlbergi_Germany_BOLD_AAN0795
BCEAB149-16_Hesperocorixa_sahlbergi_Germany_BOLD_AAN0795
GBMIX2975-16_Hesperocorixa_sahlbergi_Poland_BOLD_AAN0795
BCEAB145-16_Hesperocorixa_sahlbergi_Germany_BOLD_AAN0795
BCEAB134-16_Hesperocorixa_sahlbergi_Germany_BOLD_AAN0795
PLSW134-20_Hesperocorixa_sahlbergi_Poland_BOLD_AAN0795
BCEAB144-16_Hesperocorixa_sahlbergi_Germany_BOLD_AAN0795
GBMIX2948-16_Hesperocorixa_sahlbergi_Spain_BOLD_AAN0795
IBIHP131-20_Hesperocorixa_sahlbergi_Portugal_BOLD_AAN0795
GBMIX2946-16_Hesperocorixa_sahlbergi_Spain_BOLD_AAN0795
GBMIX2944-16_Hesperocorixa_sahlbergi_Spain_BOLD_AAN0795
FBAQU704-10_Hesperocorixa_sahlbergi_Germany_BOLD_AAN0795
FBAQU1275-12_Hesperocorixa_sahlbergi_Germany_BOLD_AAN0795
BCEAB320-16_Hesperocorixa_sahlbergi_Germany_BOLD_AAN0795
BCEAB573-17_Hesperocorixa_sahlbergi_Germany_BOLD_AAN0795
GBMIX2962-16_Hesperocorixa_sahlbergi_Portugal_BOLD_AAN0795
GBMIX2977-16_Hesperocorixa_sahlbergi_Poland_BOLD_AAN0795
GBMIX2971-16_Hesperocorixa_sahlbergi_Poland_BOLD_AAN0795
GBMIX2980-16_Hesperocorixa_sahlbergi_Poland_BOLD_AAN0795
Species 29:
HEMFI1202-16_Hesperocorixa_linnaei_Finland_BOLD_ABX0448
HEMFI1204-16_Hesperocorixa_linnaei_Finland_BOLD_ABX0448
BCEAB494-17_Hesperocorixa_linnaei_Germany_BOLD_ABX0448
BCEAB491-17_Hesperocorixa_linnaei_Germany_BOLD_ABX0448
BCEAB492-17_Hesperocorixa_linnaei_Germany_BOLD_ABX0448
BCEAB131-16_Hesperocorixa_linnaei_Germany_BOLD_ABX0448
MOHET240-21_Hesperocorixa_linnaei_Montenegro_BOLD_ABX0448
MOHET241-21_Hesperocorixa_linnaei_Montenegro_BOLD_ABX0448
BCEAB605-17_Hesperocorixa_linnaei_Germany_BOLD_ABX0448
MOHET239-21_Hesperocorixa_linnaei_Montenegro_BOLD_ABX0448
FBAQU1274-12_Hesperocorixa_linnaei_Germany_BOLD_ABX0448
BCEAB493-17_Hesperocorixa_linnaei_Germany_BOLD_ABX0448
BCEAB606-17_Hesperocorixa_linnaei_Germany_BOLD_ABX0448
HEMFI011-12_Hesperocorixa_linnaei_Finland_BOLD_ABX0448
MOHET096-20_Hesperocorixa_linnaei_Montenegro_BOLD_ABX0448
Species 30:
SICOF109-19_Parasigara_perdubia_Spain_BOLD_AEC6783
SICOF108-19_Parasigara_perdubia_Spain_BOLD_AEC6783
Species 31:
HEMFI009-12_Hesperocorixa_castanea_Finland_BOLD_ABX0447
BCEAB127-16_Hesperocorixa_castanea_Germany_BOLD_ABX0447
BCEAB122-16_Hesperocorixa_castanea_Germany_BOLD_ABX0447
BCEAB121-16_Hesperocorixa_castanea_Germany_BOLD_ABX0447
BCEAB125-16_Hesperocorixa_castanea_Germany_BOLD_ABX0447
BCEAB129-16_Hesperocorixa_castanea_Germany_BOLD_ABX0447
BCEAB126-16_Hesperocorixa_castanea_Germany_BOLD_ABX0447
BCEAB120-16_Hesperocorixa_castanea_Germany_BOLD_ABX0447
BCEAB130-16_Hesperocorixa_castanea_Germany_BOLD_ABX0447
BCEAB123-16_Hesperocorixa_castanea_Germany_BOLD_ABX0447
BCEAB124-16_Hesperocorixa_castanea_Germany_BOLD_ABX0447
BCEAB128-16_Hesperocorixa_castanea_Germany_BOLD_ABX0447
BCEAB119-16_Hesperocorixa_castanea_Germany_BOLD_ABX0447
BCEAB118-16_Hesperocorixa_castanea_Germany_BOLD_ABX0447
BCEAB321-16_Hesperocorixa_castanea_Germany_BOLD_ABX0447
DTNHM3569-21_Hesperocorixa_moesta_United_Kingdom_BOLD_ACY1096
DTNHM3574-21_Hesperocorixa_castanea_United_Kingdom_BOLD_ABX0447
Species 32:
ZMBN1966-21_Cymatia_bonsdorffi_Norway_BOLD_ABX0396
PLSW109-20_Cymatia_bonsdorffi_Poland_BOLD_ABX0396
HEMFI001-12_Cymatia_bonsdorffii_Finland_BOLD_ABX0396
ZMBN1725-20_Cymatia_bonsdorffi_Norway_BOLD_ABX0396
BCEAB498-17_Cymatia_bonsdorffii_Germany_BOLD_ABX0396
BCEAB077-16_Cymatia_bonsdorffii_Germany_BOLD_ABX0396
BCEAB078-16_Cymatia_bonsdorffii_Germany_BOLD_ABX0396
BCEAB099-16_Cymatia_bonsdorffii_Germany_BOLD_ABX0396
Species 33:
BCEAB446-16_Cymatia_coleoptrata_Germany_BOLD_ADD1561
BCEAB447-16_Cymatia_coleoptrata_Germany_BOLD_ADD1561
Species 34:
FBAQU1269-12_Cymatia_rogenhoferi_Germany_BOLD_ACB2132
Species 35:
PLHET013-21_Ilyocoris_cimicoides_Poland_BOLD_AAF2590
BCEAB162-16_Ilyocoris_cimicoides_Germany_BOLD_AAF2590
BCEAB158-16_Ilyocoris_cimicoides_Germany_BOLD_AAF2590
BCEAB161-16_Ilyocoris_cimicoides_Germany_BOLD_AAF2590
BCEAB160-16_Ilyocoris_cimicoides_Germany_BOLD_AAF2590
BCEAB568-17_Ilyocoris_cimicoides_Germany_BOLD_AAF2590
BCEAB619-17_Ilyocoris_cimicoides_Germany_BOLD_AAF2590
BCEAB159-16_Ilyocoris_cimicoides_Germany_BOLD_AAF2590
FBAQU014-09_Ilyocoris_cimicoides_Germany_BOLD_AAF2590
BCEAB157-16_Ilyocoris_cimicoides_Germany_BOLD_AAF2590
GBMIX2964-16_Ilyocoris_cimicoides_Germany_BOLD_AAF2590
MOHET192-21_Ilyocoris_cimicoides_Montenegro_BOLD_AAF2590
PLHET011-21_Ilyocoris_cimicoides_Poland_BOLD_AAF2590
BCEAB156-16_Ilyocoris_cimicoides_Germany_BOLD_AAF2590
BCEAB572-17_Ilyocoris_cimicoides_Germany_BOLD_AAF2590
MOHET190-21_Ilyocoris_cimicoides_Albania_BOLD_AAF2590
BCEAB569-17_Ilyocoris_cimicoides_Germany_BOLD_AAF2590
BCEAB571-17_Ilyocoris_cimicoides_Germany_BOLD_AAF2590
BCEAB507-17_Ilyocoris_cimicoides_Germany_BOLD_AAF2590
PLHET012-21_Ilyocoris_cimicoides_Poland_BOLD_AAF2590
MOHET228-21_Ilyocoris_cimicoides_Montenegro_BOLD_AAF2590
MOHET181-21_Ilyocoris_cimicoides_Montenegro_BOLD_AAF2590
MOHET180-21_Ilyocoris_cimicoides_Montenegro_BOLD_AAF2590
MOHET235-21_Ilyocoris_cimicoides_Montenegro_BOLD_AAF2590
BCEAB570-17_Ilyocoris_cimicoides_Germany_BOLD_AAF2590
Species 36:
COLFH2036-16_Micronecta_minutissima_Finland_BOLD_AAK6480
COLFH2041-16_Micronecta_minutissima_Finland_BOLD_AAK6480
FBAQU1283-12_Micronecta_griseola_Germany_BOLD_AAK6480
FBAQU001-09_Micronecta_griseola_Germany_BOLD_AAK6480
COLFH2040-16_Micronecta_poweri_Finland_BOLD_AEU4998
COLFH2045-16_Micronecta_poweri_Finland_BOLD_AEU4998
FBAQU1284-12_Micronecta_poweri_Germany_BOLD_ACB1970
BCEAB629-17_Micronecta_poweri_Germany_BOLD_AET2405
Species 37:
MOHET245-21_Micronecta_poweri_Montenegro_BOLD_AET2410
MOHET135-20_Micronecta_poweri_Montenegro_BOLD_AET2410
MOHET045-20_Micronecta_poweri_Montenegro_BOLD_AET2410
MOHET046-20_Micronecta_poweri_Montenegro_BOLD_AET2410
Species 38:
BCEAB359-16_Micronecta_scholtzi_Germany_BOLD_AAK6479
BCEAB363-16_Micronecta_scholtzi_Germany_BOLD_AAK6479
BCEAB360-16_Micronecta_scholtzi_Germany_BOLD_AAK6479
BCEAB362-16_Micronecta_scholtzi_Germany_BOLD_AAK6479
FBAQU077-09_Micronecta_scholtzi_Germany_BOLD_AAK6479
BCEAB361-16_Micronecta_scholtzi_Germany_BOLD_AAK6479
Species 39:
MOHET129-20_Micronecta_pusilla_Montenegro_BOLD_AEG9578
MOHET210-21_Micronecta_pusilla_Montenegro_BOLD_AEG9578
MOHET208-21_Micronecta_pusilla_Montenegro_BOLD_AEG9578
MOHET213-21_Micronecta_pusilla_Montenegro_BOLD_AEG9578
MOHET209-21_Micronecta_pusilla_Montenegro_BOLD_AEG9578
MOHET211-21_Micronecta_pusilla_Montenegro_BOLD_AEG9578
MOHET126-20_Micronecta_pusilla_Montenegro_BOLD_AEG9578
MOHET206-21_Micronecta_pusilla_Montenegro_BOLD_AEG9578
MOHET204-21_Micronecta_pusilla_Montenegro_BOLD_AEG9578
MOHET128-20_Micronecta_pusilla_Montenegro_BOLD_AEG9578
MOHET212-21_Micronecta_pusilla_Montenegro_BOLD_AEG9578
MOHET130-20_Micronecta_pusilla_Montenegro_BOLD_AEG9578
MOHET205-21_Micronecta_pusilla_Montenegro_BOLD_AEG9578
Species 40:
PLHET010-21_Ranatra_linearis_Poland_BOLD_AAL1328
BCEAB566-17_Ranatra_linearis_Germany_BOLD_AAL1328
BCEAB520-17_Ranatra_linearis_Germany_BOLD_AAL1328
BCEAB450-17_Ranatra_linearis_Germany_BOLD_AAL1328
PLSW158-20_Ranatra_linearis_Poland_BOLD_AAL1328
BCEAB565-17_Ranatra_linearis_Germany_BOLD_AAL1328
BCEAB543-17_Ranatra_linearis_Austria_BOLD_AAL1328
PLHET014-21_Ranatra_linearis_Poland_BOLD_AAL1328
MOHET131-20_Ranatra_linearis_Montenegro_BOLD_AAL1328
MOHET242-21_Ranatra_linearis_Albania_BOLD_AAL1328
MOHET132-20_Ranatra_linearis_Montenegro_BOLD_AAL1328
IBIHP016-19_Ranatra_linearis_Portugal_BOLD_AAL1328
IBIHP020-19_Ranatra_linearis_Portugal_BOLD_AAL1328
IBIHP022-19_Ranatra_linearis_Portugal_BOLD_AAL1328
IBIHP021-19_Ranatra_linearis_Portugal_BOLD_AAL1328
IBIHP017-19_Ranatra_linearis_Portugal_BOLD_AAL1328
COLFH2048-16_Ranatra_linearis_Finland_BOLD_AAL1328
BCEAB519-17_Ranatra_linearis_Germany_BOLD_AAL1328
BCEAB367-16_Ranatra_linearis_Germany_BOLD_AAL1328
BCEAB452-17_Ranatra_linearis_Germany_BOLD_AAL1328
BCEAB449-17_Ranatra_linearis_Germany_BOLD_AAL1328
GBMIX2995-16_Ranatra_linearis_Germany_BOLD_AAL1328
FBAQU181-09_Ranatra_linearis_Germany_BOLD_AAL1328
BCEAB567-17_Ranatra_linearis_Germany_BOLD_AAL1328
PLSW157-20_Ranatra_linearis_Poland_BOLD_AAL1328
FBAQU711-10_Ranatra_linearis_Germany_BOLD_AAL1328
BCEAB451-17_Ranatra_linearis_Germany_BOLD_AAL1328
GBMIX2996-16_Ranatra_linearis_Germany_BOLD_AAL1328
PLSW156-20_Ranatra_linearis_Poland_BOLD_AAL1328
BCEAB368-16_Ranatra_linearis_Germany_BOLD_AAL1328
Species 41:
PLHET015-21_Nepa_cinerea_Poland_BOLD_AAK8359
FBAQU209-09_Nepa_cinerea_Germany_BOLD_AAK8359
BCEAB448-17_Nepa_cinerea_Germany_BOLD_AAK8359
BCEAB364-16_Nepa_cinerea_Germany_BOLD_AAK8359
BCEAB541-17_Nepa_cinerea_Germany_BOLD_AAK8359
BCEAB366-16_Nepa_cinerea_Germany_BOLD_AAK8359
BCEAB365-16_Nepa_cinerea_Germany_BOLD_AAK8359
GBMIX2969-16_Nepa_cinerea_Germany_BOLD_AAK8359
GBMIX2966-16_Nepa_cinerea_Germany_BOLD_AAK8359
HEMFI099-15_Nepa_cinerea_Finland_BOLD_AAK8359
MOHET232-21_Nepa_cinerea_Montenegro_BOLD_AAK8359
BCEAB615-17_Nepa_cinerea_Germany_BOLD_AAK8359
MOHET257-21_Nepa_cinerea_Montenegro_BOLD_AAK8359
MOHET033-20_Nepa_cinerea_Montenegro_BOLD_AEH5788
MOHET134-20_Nepa_cinerea_Montenegro_BOLD_AEH5788
MOHET178-21_Nepa_cinerea_Montenegro_BOLD_AEH5788
COLHH1728-18_Nepa_cinerea_Norway_BOLD_ADP8747
COLHH1727-18_Nepa_cinerea_Norway_BOLD_ADP8747
XJDQD399-18_Nepa_cinerea_China_BOLD_ADL0058
XJDQD398-18_Nepa_cinerea_China_BOLD_ADL0058
XJDQD397-18_Nepa_cinerea_China_BOLD_ADL0058
XJDQD396-18_Nepa_cinerea_China_BOLD_ADL0058
IBIHP041-20_Nepa_cinerea_Portugal_BOLD_AEC3215
IBIHP045-20_Nepa_cinerea_Portugal_BOLD_AEC3215
IBIHP044-20_Nepa_cinerea_Portugal_BOLD_AEC3215
Species 42:
PLHET009-21_Aphelocheirus_aestivalis_Poland_BOLD_ABX0398
HEMFI025-12_Aphelocheirus_aestivalis_Finland_BOLD_ABX0398
GBMIX2985-16_Aphelocheirus_aestivalis_Germany_BOLD_ABX0398
GHET006-18_Aphelocheirus_aestivalis_Germany_BOLD_ABX0398
GHET008-18_Aphelocheirus_aestivalis_Germany_BOLD_ABX0398
GHET005-18_Aphelocheirus_aestivalis_Germany_BOLD_ABX0398
GBMIX2984-16_Aphelocheirus_aestivalis_Germany_BOLD_ABX0398
GHET004-18_Aphelocheirus_aestivalis_Germany_BOLD_ABX0398
GHET010-18_Aphelocheirus_aestivalis_Germany_BOLD_ABX0398
GHET007-18_Aphelocheirus_aestivalis_Germany_BOLD_ABX0398
GHET013-18_Aphelocheirus_aestivalis_Germany_BOLD_ABX0398
GHET011-18_Aphelocheirus_aestivalis_Germany_BOLD_ABX0398
GHET012-18_Aphelocheirus_aestivalis_Germany_BOLD_ABX0398
GHET014-18_Aphelocheirus_aestivalis_Germany_BOLD_ABX0398
Species 43:
FBUK028-21_Hebrus_ruficeps_United_Kingdom_BOLD_AAI6967
BCEAB169-16_Hebrus_ruficeps_Germany_BOLD_AAI6967
BCEAB171-16_Hebrus_ruficeps_Germany_BOLD_AAI6967
FBAQU096-09_Hebrus_ruficeps_Germany_BOLD_AAI6967
HEMFI116-15_Hebrus_ruficeps_Finland_BOLD_AAI6967
BCEAB168-16_Hebrus_ruficeps_Germany_BOLD_AAI6967
ZMBN1836-21_Hebrus_ruficeps_Norway_BOLD_AAI6967
BCEAB170-16_Hebrus_ruficeps_Germany_BOLD_AAI6967
BCEAB167-16_Hebrus_ruficeps_Germany_BOLD_AAI6967
ZMBN1881-21_Hebrus_ruficeps_Norway_BOLD_AAI6967
COLFH2093-16_Hebrus_ruficeps_Finland_BOLD_AAI6967
COLFH2092-16_Hebrus_ruficeps_Finland_BOLD_AAI6967
FBAQU205-09_Hebrus_ruficeps_Germany_BOLD_AAI6967
Species 44:
COLFH2035-16_Hebrus_pusillus_Finland_BOLD_ADF2006
Species 45:
FBAQU703-10_Hebrus_pusillus_Germany_BOLD_AAN0981
FBHET114-11_Hebrus_pusillus_Germany_BOLD_AAN0981
GBMIN68656-17_Hebrus_sp__AC-2016_France_BOLD_AAN0981
Species 46:
ZMBN044-15_Hydrometra_stagnorum_Norway_BOLD_ACX7898
MOHET059-20_Hydrometra_stagnorum_Montenegro_BOLD_AEC2693
MOHET060-20_Hydrometra_stagnorum_Montenegro_BOLD_AEC2693
IBIHP043-20_Hydrometra_stagnorum_Portugal_BOLD_AEC2693
MOHET234-21_Hydrometra_stagnorum_Montenegro_BOLD_AEC2693
MOHET229-21_Hydrometra_stagnorum_Montenegro_BOLD_AEC2693
MOHET230-21_Hydrometra_stagnorum_Montenegro_BOLD_AEC2693
MOHET231-21_Hydrometra_stagnorum_Montenegro_BOLD_AEC2693
BCEAB310-16_Hydrometra_stagnorum_Germany_BOLD_AAK5632
PLSW104-20_Hydrometra_stagnorum_Poland_BOLD_AAK5632
BCEAB315-16_Hydrometra_stagnorum_Germany_BOLD_AAK5632
MOHET108-20_Hydrometra_stagnorum_Albania_BOLD_AAK5632
MOHET252-21_Hydrometra_stagnorum_Montenegro_BOLD_AAK5632
FBAQU1277-12_Hydrometra_stagnorum_Germany_BOLD_AAK5632
BCEAB309-16_Hydrometra_stagnorum_Germany_BOLD_AAK5632
BCEAB308-16_Hydrometra_stagnorum_Germany_BOLD_AAK5632
BCEAB313-16_Hydrometra_stagnorum_Germany_BOLD_AAK5632
FBHET909-12_Hydrometra_stagnorum_Germany_BOLD_AAK5632
BCEAB307-16_Hydrometra_stagnorum_Germany_BOLD_AAK5632
GBMIN68735-17_Hydrometra_stagnorum_France_BOLD_AAK5632
FBAQU034-09_Hydrometra_stagnorum_Germany_BOLD_AAK5632
BCEAB311-16_Hydrometra_stagnorum_Germany_BOLD_AAK5632
BCEAB314-16_Hydrometra_stagnorum_Germany_BOLD_AAK5632
BCEAB306-16_Hydrometra_stagnorum_Germany_BOLD_AAK5632
BCEAB305-16_Hydrometra_stagnorum_Germany_BOLD_AAK5632
BCEAB312-16_Hydrometra_stagnorum_Germany_BOLD_AAK5632
BCEAB304-16_Hydrometra_stagnorum_Germany_BOLD_AAK5632
BCEAB303-16_Hydrometra_stagnorum_Germany_BOLD_AAK5632
BCEAB302-16_Hydrometra_stagnorum_Germany_BOLD_AAK5632
BCEAB496-17_Hydrometra_stagnorum_Germany_BOLD_AAK5632
MOHET253-21_Hydrometra_stagnorum_Montenegro_BOLD_AAK5632
BCEAB550-17_Hydrometra_stagnorum_Austria_BOLD_AAK5632
MOHET255-21_Hydrometra_stagnorum_Montenegro_BOLD_AAK5632
MOHET233-21_Hydrometra_stagnorum_Montenegro_BOLD_AAK5632
MOHET254-21_Hydrometra_stagnorum_Montenegro_BOLD_AAK5632
FBAQU1278-12_Hydrometra_stagnorum_Germany_BOLD_AAK5632
Species 47:
HEMFI118-15_Hydrometra_gracilenta_Finland_BOLD_AAN0857
FBAQU1519-13_Hydrometra_gracilenta_Germany_BOLD_AAN0857
FBAQU1276-12_Hydrometra_gracilenta_Germany_BOLD_AAN0857
FBHET068-11_Hydrometra_gracilenta_Germany_BOLD_AAN0857
FBHET069-11_Hydrometra_gracilenta_Germany_BOLD_AAN0857
BCEAB172-16_Hydrometra_gracilenta_Germany_BOLD_AAN0857
BCEAB300-16_Hydrometra_gracilenta_Germany_BOLD_AAN0857
BCEAB299-16_Hydrometra_gracilenta_Germany_BOLD_AAN0857
BCEAB301-16_Hydrometra_gracilenta_Germany_BOLD_AAN0857
FBAQU705-10_Hydrometra_gracilenta_Germany_BOLD_AAN0857
HEMFI117-15_Hydrometra_gracilenta_Finland_BOLD_AAN0857
Species 48:
GBMHH20162-19_Mesovelia_furcata_France_BOLD_AAN2451
COLFH2028-16_Mesovelia_furcata_Finland_BOLD_AAN2451
BCEAB453-17_Mesovelia_furcata_Germany_BOLD_AAN2451
COLFH1991-16_Mesovelia_furcata_Finland_BOLD_AAN2451
COLFH1990-16_Mesovelia_furcata_Finland_BOLD_AAN2451
BCEAB291-16_Mesovelia_furcata_Germany_BOLD_AAN2451
BCEAB296-16_Mesovelia_furcata_Germany_BOLD_AAN2451
BCEAB297-16_Mesovelia_furcata_Germany_BOLD_AAN2451
BCEAB298-16_Mesovelia_furcata_Germany_BOLD_AAN2451
BCEAB294-16_Mesovelia_furcata_Germany_BOLD_AAN2451
BCEAB295-16_Mesovelia_furcata_Germany_BOLD_AAN2451
BCEAB486-17_Mesovelia_furcata_Germany_BOLD_AAN2451
BCEAB165-16_Mesovelia_furcata_Germany_BOLD_AAN2451
BCEAB166-16_Mesovelia_furcata_Germany_BOLD_AAN2451
BCEAB164-16_Mesovelia_furcata_Germany_BOLD_AAN2451
FBAQU706-10_Mesovelia_furcata_Germany_BOLD_AAN2451
FBAQU1281-12_Mesovelia_furcata_Germany_BOLD_AAN2451
BCEAB293-16_Mesovelia_furcata_Germany_BOLD_AAN2451
BCEAB292-16_Mesovelia_furcata_Germany_BOLD_AAN2451
BCEAB290-16_Mesovelia_furcata_Germany_BOLD_AAN2451
BCEAB289-16_Mesovelia_furcata_Germany_BOLD_AAN2451
Species 49:
BCEAB419-16_Mesovelia_vittigera_Greece_BOLD_ACD4048
BCEAB537-17_Mesovelia_vittigera_Greece_BOLD_ACD4048
BCEAB536-17_Mesovelia_vittigera_Greece_BOLD_ACD4048
BCEAB418-16_Mesovelia_vittigera_Greece_BOLD_ACD4048
Species 50:
LEFIJ7747-18_Microvelia_buenoi_Finland_BOLD_ACY1789
BCEAB163-16_Microvelia_buenoi_Germany_BOLD_ACY1789
Species 51:
BCEAB281-16_Microvelia_reticulata_Germany_BOLD_AAG4341
PLSW115-20_Microvelia_reticulata_Poland_BOLD_AAG4341
BCEAB280-16_Microvelia_reticulata_Germany_BOLD_AAG4341
FBAQU208-09_Microvelia_reticulata_Germany_BOLD_AAG4341
VARPL012-21_Microvelia_reticulata_Poland_BOLD_AAG4341
VARPL014-21_Microvelia_reticulata_Poland_BOLD_AAG4341
FBAQU1520-13_Microvelia_reticulata_Germany_BOLD_AAG4341
BCEAB561-17_Microvelia_reticulata_Germany_BOLD_AAG4341
BCEAB555-17_Microvelia_reticulata_Austria_BOLD_AAG4341
BCEAB287-16_Microvelia_reticulata_Germany_BOLD_AAG4341
BCEAB286-16_Microvelia_reticulata_Germany_BOLD_AAG4341
BCEAB283-16_Microvelia_reticulata_Germany_BOLD_AAG4341
PLSW117-20_Microvelia_reticulata_Poland_BOLD_AAG4341
BCEAB551-17_Microvelia_reticulata_Austria_BOLD_AAG4341
BCEAB288-16_Microvelia_reticulata_Germany_BOLD_AAG4341
BCEAB284-16_Microvelia_reticulata_Germany_BOLD_AAG4341
BCEAB487-17_Microvelia_reticulata_Germany_BOLD_AAG4341
BCEAB560-17_Microvelia_reticulata_Germany_BOLD_AAG4341
BCEAB285-16_Microvelia_reticulata_Germany_BOLD_AAG4341
BCEAB407-16_Microvelia_reticulata_Germany_BOLD_AAG4341
BCEAB554-17_Microvelia_reticulata_Austria_BOLD_AAG4341
BCEAB279-16_Microvelia_reticulata_Germany_BOLD_AAG4341
ZMBN1720-20_Microvelia_reticulata_Norway_BOLD_AAG4341
FBAQU020-09_Microvelia_reticulata_Germany_BOLD_AAG4340
BCEAB278-16_Microvelia_reticulata_Germany_BOLD_AAG4341
BCEAB406-16_Microvelia_reticulata_Germany_BOLD_AAG4341
PLSW116-20_Microvelia_reticulata_Poland_BOLD_AAG4341
FBHET670-12_Microvelia_reticulata_Germany_BOLD_AAG4341
BCEAB275-16_Microvelia_reticulata_Germany_BOLD_AAG4341
BCEAB276-16_Microvelia_reticulata_Germany_BOLD_AAG4341
BCEAB277-16_Microvelia_reticulata_Germany_BOLD_AAG4341
BCEAB552-17_Microvelia_reticulata_Austria_BOLD_AAG4341
BCEAB553-17_Microvelia_reticulata_Austria_BOLD_AAG4341
BCEAB282-16_Microvelia_reticulata_Germany_BOLD_AAG4341
Species 52:
ZMBN308-16_Velia_caprai_Norway_BOLD_AAN0455
ZMBN016-15_Velia_caprai_Norway_BOLD_AAN0455
BCEAB489-17_Velia_caprai_Germany_BOLD_AAN0455
BCEAB506-17_Velia_caprai_Germany_BOLD_AAN0455
BCEAB266-16_Velia_caprai_Germany_BOLD_AAN0455
BCEAB265-16_Velia_caprai_Germany_BOLD_AAN0455
FBAQU1299-12_Velia_caprai_Germany_BOLD_AAN0455
BCEAB271-16_Velia_caprai_Germany_BOLD_AAN0455
BCEAB488-17_Velia_caprai_Germany_BOLD_AAN0455
BCEAB272-16_Velia_caprai_Germany_BOLD_AAN0455
BCEAB490-17_Velia_caprai_Germany_BOLD_AAN0455
BCEAB268-16_Velia_caprai_Switzerland_BOLD_AAN0455
BCEAB273-16_Velia_caprai_Germany_BOLD_AAN0455
BCEAB267-16_Velia_caprai_Germany_BOLD_AAN0455
EUBUG525-11_Velia_caprai_Germany_BOLD_AAN0455
PLSW145-20_Velia_caprai_Poland_BOLD_AAN0455
ZMBN304-16_Velia_caprai_Norway_BOLD_AAN0455
BCEAB274-16_Velia_caprai_Germany_BOLD_AAN0455
EUBUG526-11_Velia_caprai_Germany_BOLD_AAN0455
BCEAB269-16_Velia_caprai_Germany_BOLD_AAN0455
FBAQU1518-13_Velia_caprai_Germany_BOLD_AAN0455
BCEAB270-16_Velia_caprai_Germany_BOLD_AAN0455
FBAQU715-10_Velia_caprai_Germany_BOLD_AAN0455
DTNHM3557-21_Velia_caprai_United_Kingdom_BOLD_AAN0455
BCEAB396-16_Velia_caprai_Austria_BOLD_AAN0455
FBHET671-12_Velia_saulii_Germany_BOLD_ABX0836
BCEAB623-17_Velia_currens_Switzerland_BOLD_ADI1962
BCEAB625-17_Velia_currens_Switzerland_BOLD_ADI1962
BCEAB624-17_Velia_currens_Switzerland_BOLD_ADI1962
Species 53:
MOHET054-20_Velia_affinis_Montenegro_BOLD_AEG0715
MOHET066-20_Velia_affinis_Montenegro_BOLD_AEG0715
MOHET156-20_Velia_affinis_Montenegro_BOLD_AEG0715
MOHET065-20_Velia_affinis_Montenegro_BOLD_AEG0715
MOHET191-21_Velia_affinis_Montenegro_BOLD_AEG0715
MOHET055-20_Velia_affinis_Montenegro_BOLD_AEG0715
MOHET069-20_Velia_affinis_Montenegro_BOLD_AEG0715
MOHET068-20_Velia_affinis_Montenegro_BOLD_AEG0715
MOHET057-20_Velia_affinis_Montenegro_BOLD_AEG0715
MOHET080-20_Velia_affinis_Montenegro_BOLD_AEG0715
MOHET067-20_Velia_affinis_Montenegro_BOLD_AEG0715
MOHET079-20_Velia_affinis_Montenegro_BOLD_AEG0715
MOHET081-20_Velia_affinis_Montenegro_BOLD_AEG0715
MOHET160-20_Velia_affinis_Montenegro_BOLD_AEG0715
MOHET159-20_Velia_affinis_Montenegro_BOLD_AEG0715
MOHET106-20_Velia_affinis_Albania_BOLD_AEG0715
Species 54:
MOHET090-20_Velia_sp__Montenegro_BOLD_AEF9274
MOHET170-21_Velia_sp__Montenegro_BOLD_AEF9274
MOHET091-20_Velia_sp__Montenegro_BOLD_AEF9274
Species 55:
VARPL006-21_Gerris_odontogaster_Poland_BOLD_ADD1838
BCEAB215-16_Gerris_odontogaster_Germany_BOLD_ADD1838
BCEAB216-16_Gerris_odontogaster_Germany_BOLD_ADD1838
BCEAB217-16_Gerris_odontogaster_Germany_BOLD_ADD1838
BCEAB214-16_Gerris_odontogaster_Germany_BOLD_ADD1838
BCEAB213-16_Gerris_odontogaster_Germany_BOLD_ADD1838
BCEAB212-16_Gerris_odontogaster_Germany_BOLD_ADD1838
VARPL017-21_Gerris_odontogaster_Poland_BOLD_ADD1838
BCEAB221-16_Gerris_odontogaster_Germany_BOLD_ADD1838
BCEAB218-16_Gerris_odontogaster_Germany_BOLD_ADD1838
BCEAB219-16_Gerris_odontogaster_Germany_BOLD_ADD1838
BCEAB222-16_Gerris_odontogaster_Germany_BOLD_ADD1838
BCEAB209-16_Gerris_odontogaster_Germany_BOLD_ADD1838
VARPL016-21_Gerris_odontogaster_Poland_BOLD_ADD1838
BCEAB210-16_Gerris_odontogaster_Germany_BOLD_ADD1838
BCEAB211-16_Gerris_odontogaster_Germany_BOLD_ADD1838
BCEAB220-16_Gerris_odontogaster_Germany_BOLD_ADD1838
VARPL005-21_Gerris_odontogaster_Poland_BOLD_ADD1838
BCEAB400-16_Gerris_odontogaster_Austria_BOLD_ADD1838
BCEAB208-16_Gerris_odontogaster_Germany_BOLD_ADD1838
Species 56:
PLSW193-21_Gerris_odontogaster_Poland_BOLD_ABU6679
ZMBN1280-18_Gerris_odontogaster_Norway_BOLD_ABU6679
HETFI004-11_Gerris_odontogaster_Norway_BOLD_ABU6679
COLFH1909-16_Gerris_odontogaster_Finland_BOLD_ABU6679
ZMBN1718-20_Gerris_odontogaster_Norway_BOLD_ABU6679
ZMBN1843-21_Gerris_odontogaster_Norway_BOLD_ABU6679
ZMBN1844-21_Gerris_odontogaster_Norway_BOLD_ABU6679
FBAQU1272-12_Gerris_odontogaster_Germany_BOLD_ABU6679
ZMBN310-16_Gerris_odontogaster_Norway_BOLD_ABU6679
Species 57:
PLHET030-21_Gerris_argentatus_Poland_BOLD_ADD1846
BCEAB229-16_Gerris_argentatus_Germany_BOLD_ADD1846
BCEAB426-16_Gerris_argentatus_Germany_BOLD_ADD1846
BCEAB429-16_Gerris_argentatus_Germany_BOLD_ADD1846
BCEAB427-16_Gerris_argentatus_Germany_BOLD_ADD1846
BCEAB224-16_Gerris_argentatus_Germany_BOLD_ADD1846
BCEAB225-16_Gerris_argentatus_Germany_BOLD_ADD1846
BCEAB228-16_Gerris_argentatus_Greece_BOLD_ADD1846
BCEAB226-16_Gerris_argentatus_Germany_BOLD_ADD1846
BCEAB227-16_Gerris_argentatus_Greece_BOLD_ADD1846
BCEAB428-16_Gerris_argentatus_Germany_BOLD_ADD1846
BCEAB223-16_Gerris_argentatus_Germany_BOLD_ADD1846
PLSW178-20_Gerris_argentatus_Poland_BOLD_ADD1846
MOHET049-20_Gerris_argentatus_Montenegro_BOLD_ADD1846
MOHET047-20_Gerris_argentatus_Montenegro_BOLD_ADD1846
MOHET084-20_Gerris_argentatus_Montenegro_BOLD_ADD1846
BCEAB385-16_Gerris_argentatus_Germany_BOLD_ADD1846
BCEAB245-16_Gerris_argentatus_Germany_BOLD_ADD1846
BCEAB230-16_Gerris_argentatus_Germany_BOLD_ADD1846
BCEAB233-16_Gerris_argentatus_Germany_BOLD_ADD1846
BCEAB238-16_Gerris_argentatus_Germany_BOLD_ADD1846
BCEAB234-16_Gerris_argentatus_Germany_BOLD_ADD1846
BCEAB247-16_Gerris_argentatus_Germany_BOLD_ADD1846
BCEAB235-16_Gerris_argentatus_Germany_BOLD_ADD1846
BCEAB241-16_Gerris_argentatus_Germany_BOLD_ADD1846
BCEAB239-16_Gerris_argentatus_Germany_BOLD_ADD1846
BCEAB237-16_Gerris_argentatus_Germany_BOLD_ADD1846
BCEAB246-16_Gerris_argentatus_Germany_BOLD_ADD1846
BCEAB240-16_Gerris_argentatus_Germany_BOLD_ADD1846
BCEAB231-16_Gerris_argentatus_Germany_BOLD_ADD1846
BCEAB244-16_Gerris_argentatus_Germany_BOLD_ADD1846
BCEAB236-16_Gerris_argentatus_Germany_BOLD_ADD1846
BCEAB232-16_Gerris_argentatus_Germany_BOLD_ADD1846
BCEAB242-16_Gerris_argentatus_Germany_BOLD_ADD1846
BCEAB243-16_Gerris_argentatus_Germany_BOLD_ADD1846
MOHET085-20_Gerris_argentatus_Montenegro_BOLD_ADD1846
Species 58:
OHRBA241-22_Gerris_costae_Macedonia_BOLD_ACI6181
BCEAB583-17_Gerris_costae_Switzerland_BOLD_ACI6181
MOHET153-20_Gerris_costae_Montenegro_BOLD_ACI6181
TRSKA3616-20_Gerris_costae_Montenegro_BOLD_ACI6181
TRSKA3611-20_Gerris_costae_Montenegro_BOLD_ACI6181
MOHET151-20_Gerris_costae_Montenegro_BOLD_ACI6181
BCEAB200-16_Gerris_costae_Austria_BOLD_ACI6181
MOHET174-21_Gerris_costae_Montenegro_BOLD_ACI6181
MOHET149-20_Gerris_costae_Montenegro_BOLD_ACI6181
MOHET175-21_Gerris_costae_Montenegro_BOLD_ACI6181
TRSKA3610-20_Gerris_costae_Montenegro_BOLD_ACI6181
MOHET154-20_Gerris_costae_Montenegro_BOLD_ACI6181
MOHET150-20_Gerris_costae_Montenegro_BOLD_ACI6181
BCEAB199-16_Gerris_costae_Austria_BOLD_ACI6181
BCEAB203-16_Gerris_costae_Switzerland_BOLD_ACI6181
MOHET038-20_Gerris_costae_Montenegro_BOLD_ACI6181
MOHET177-21_Gerris_costae_Montenegro_BOLD_ACI6181
BCEAB198-16_Gerris_costae_Austria_BOLD_ACI6181
BCEAB609-17_Gerris_costae_Germany_BOLD_ACI6181
BCEAB201-16_Gerris_costae_Austria_BOLD_ACI6181
MOHET173-21_Gerris_costae_Montenegro_BOLD_ACI6181
MOHET176-21_Gerris_costae_Montenegro_BOLD_ACI6181
BCEAB204-16_Gerris_costae_Switzerland_BOLD_ACI6181
BCEAB202-16_Gerris_costae_Austria_BOLD_ACI6181
MOHET037-20_Gerris_costae_Montenegro_BOLD_ACI6181
MOHET148-20_Gerris_costae_Montenegro_BOLD_ACI6181
BCEAB197-16_Gerris_costae_Austria_BOLD_ACI6181
TRSKA3614-20_Gerris_costae_Montenegro_BOLD_ACI6181
Species 59:
BCEAB205-16_Gerris_thoracicus_Germany_BOLD_ACB1745
BCEAB206-16_Gerris_thoracicus_Germany_BOLD_ACB1745
BCEAB207-16_Gerris_thoracicus_Greece_BOLD_ACB1745
FBAQU1273-12_Gerris_thoracicus_Germany_BOLD_ACB1745
MOHET041-20_Gerris_thoracicus_Montenegro_BOLD_ACB1745
MOHET088-20_Gerris_thoracicus_Montenegro_BOLD_ACB1745
MOHET042-20_Gerris_thoracicus_Montenegro_BOLD_ACB1745
MOHET155-20_Gerris_thoracicus_Montenegro_BOLD_ACB1745
MOHET044-20_Gerris_thoracicus_Montenegro_BOLD_ACB1745
MOHET043-20_Gerris_thoracicus_Montenegro_BOLD_ACB1745
Species 60:
PLHET021-21_Gerris_lacustris_Poland_BOLD_ACT3584
BCEAB176-16_Gerris_lacustris_Germany_BOLD_ACT3584
BCEAB177-16_Gerris_lacustris_Italy_BOLD_ACT3584
BCEAB395-16_Gerris_lacustris_Austria_BOLD_ACT3584
BCEAB431-16_Gerris_lacustris_Germany_BOLD_ACT3584
MOHET103-20_Gerris_lacustris_Albania_BOLD_ACT3584
OHRBA265-22_Gerris_lacustris_Macedonia_BOLD_ACT3584
BCEAB433-16_Gerris_lacustris_Germany_BOLD_ACT3584
MOHET221-21_Gerris_lacustris_Montenegro_BOLD_ACT3584
BCEAB181-16_Gerris_lacustris_Germany_BOLD_ACT3584
BCEAB175-16_Gerris_lacustris_Germany_BOLD_ACT3584
BCEAB390-16_Gerris_lacustris_Germany_BOLD_ACT3584
MOHET102-20_Gerris_lacustris_Albania_BOLD_ACT3584
PLHET020-21_Gerris_lacustris_Poland_BOLD_ACT3584
PLHET004-21_Gerris_lacustris_Poland_BOLD_ACT3584
BCEAB420-16_Gerris_lacustris_Austria_BOLD_ACT3584
BCEAB389-16_Gerris_lacustris_Germany_BOLD_ACT3584
BCEAB399-16_Gerris_lacustris_Austria_BOLD_ACT3584
BCEAB178-16_Gerris_lacustris_Germany_BOLD_ACT3584
BCEAB398-16_Gerris_lacustris_Austria_BOLD_ACT3584
BCEAB432-16_Gerris_lacustris_Germany_BOLD_ACT3584
BCEAB183-16_Gerris_lacustris_Germany_BOLD_ACT3584
BCEAB397-16_Gerris_lacustris_Austria_BOLD_ACT3584
BCEAB184-16_Gerris_lacustris_Germany_BOLD_ACT3584
BCEAB388-16_Gerris_lacustris_Germany_BOLD_ACT3584
BCEAB386-16_Gerris_lacustris_Germany_BOLD_ACT3584
BCEAB186-16_Gerris_lacustris_Germany_BOLD_ACT3584
BCEAB585-17_Gerris_lacustris_Austria_BOLD_ACT3584
PLHET006-21_Gerris_lacustris_Poland_BOLD_ACT3584
BCEAB174-16_Gerris_lacustris_Germany_BOLD_ACT3584
BCEAB182-16_Gerris_lacustris_Germany_BOLD_ACT3584
BCEAB392-16_Gerris_lacustris_Germany_BOLD_ACT3584
BCEAB180-16_Gerris_lacustris_Germany_BOLD_ACT3584
BCEAB173-16_Gerris_lacustris_Germany_BOLD_ACT3584
BCEAB387-16_Gerris_lacustris_Germany_BOLD_ACT3584
PLHET005-21_Gerris_lacustris_Poland_BOLD_ACT3584
BCEAB391-16_Gerris_lacustris_Germany_BOLD_ACT3584
BCEAB179-16_Gerris_lacustris_Germany_BOLD_ACT3584
PLHET019-21_Gerris_lacustris_Poland_BOLD_ACT3584
BCEAB185-16_Gerris_lacustris_Germany_BOLD_ACT3584
MOHET220-21_Gerris_lacustris_Montenegro_BOLD_ACT3584
MOHET223-21_Gerris_lacustris_Montenegro_BOLD_ACT3584
BCEAB394-16_Gerris_lacustris_Austria_BOLD_ACT3584
MOHET222-21_Gerris_lacustris_Montenegro_BOLD_ACT3584
BCEAB430-16_Gerris_lacustris_Germany_BOLD_ACT3584
MOHET207-21_Gerris_lacustris_Montenegro_BOLD_ACT3584
MOHET078-20_Gerris_lacustris_Montenegro_BOLD_ACT3584
Species 61:
BCEAB187-16_Gerris_gibbifer_Germany_BOLD_ACB1756
BCEAB189-16_Gerris_gibbifer_Germany_BOLD_ACB1756
BCEAB188-16_Gerris_gibbifer_Germany_BOLD_ACB1756
BCEAB191-16_Gerris_gibbifer_Germany_BOLD_ACB1756
BCEAB193-16_Gerris_gibbifer_Germany_BOLD_ACB1756
BCEAB195-16_Gerris_gibbifer_Germany_BOLD_ACB1756
IBIHP006-19_Gerris_gibbifer_Portugal_BOLD_ACB1756
IBIHP009-19_Gerris_gibbifer_Portugal_BOLD_ACB1756
BCEAB196-16_Gerris_gibbifer_Germany_BOLD_ACB1756
BCEAB194-16_Gerris_gibbifer_Germany_BOLD_ACB1756
BCEAB190-16_Gerris_gibbifer_Germany_BOLD_ACB1756
BCEAB192-16_Gerris_gibbifer_Germany_BOLD_ACB1756
FBAQU1271-12_Gerris_gibbifer_Germany_BOLD_ACB1756
Species 62:
ZMBN1969-21_Gerris_lateralis_Norway_BOLD_ABA3327
COLFH1910-16_Gerris_lateralis_Finland_BOLD_ABA3327
HETFI007-11_Gerris_lateralis_Norway_BOLD_ABA3327
BCEAB618-17_Gerris_lateralis_Germany_BOLD_ABA3327
BCEAB034-16_Gerris_lateralis_Germany_BOLD_ABA3327
MOHET168-21_Gerris_lateralis_Montenegro_BOLD_ABA3327
MOHET163-20_Gerris_lateralis_Montenegro_BOLD_ABA3327
MOHET258-21_Gerris_lateralis_Montenegro_BOLD_ABA3327
HETFI009-11_Gerris_lateralis_Norway_BOLD_ABA3327
MOHET169-21_Gerris_lateralis_Montenegro_BOLD_ABA3327
MOHET164-20_Gerris_lateralis_Montenegro_BOLD_ABA3327
FBAQU699-10_Gerris_asper_Germany_BOLD_ABA3327
COLFH1911-16_Gerris_lateralis_Finland_BOLD_ABA3327
Species 63:
FBAQU1516-13_Limnoporus_rufoscutellatus_Germany_BOLD_AAV0261
FBAQU1280-12_Limnoporus_rufoscutellatus_Germany_BOLD_AAV0261
BCEAB248-16_Limnoporus_rufoscutellatus_Austria_BOLD_AAV0261
Species 64:
BCEAB251-16_Aquarius_najas_Germany_BOLD_AAN1521
MOHET076-20_Aquarius_najas_Montenegro_BOLD_AAN1521
BCEAB063-16_Aquarius_najas_Italy_BOLD_AAN1521
MOHET075-20_Aquarius_najas_Montenegro_BOLD_AAN1521
MOHET074-20_Aquarius_najas_Montenegro_BOLD_AAN1521
MOHET218-21_Aquarius_najas_Montenegro_BOLD_AAN1521
MOHET157-20_Aquarius_najas_Montenegro_BOLD_AAN1521
MOHET219-21_Aquarius_najas_Montenegro_BOLD_AAN1521
MOHET104-20_Aquarius_najas_Albania_BOLD_AAN1521
FBAQU697-10_Aquarius_najas_Germany_BOLD_AAN1521
MOHET186-21_Aquarius_najas_Montenegro_BOLD_AAN1521
MOHET216-21_Aquarius_najas_Montenegro_BOLD_AAN1521
MOHET073-20_Aquarius_najas_Montenegro_BOLD_AAN1521
MOHET217-21_Aquarius_najas_Montenegro_BOLD_AAN1521
MOHET187-21_Aquarius_najas_Montenegro_BOLD_AAN1521
MOHET158-20_Aquarius_najas_Montenegro_BOLD_AAN1521
BCEAB250-16_Aquarius_najas_Germany_BOLD_AAN1521
BCEAB249-16_Aquarius_najas_Italy_BOLD_AAN1521
PLSW127-20_Aquarius_najas_Poland_BOLD_AAN1521
PLSW128-20_Aquarius_najas_Poland_BOLD_AAN1521
BCEAB252-16_Aquarius_najas_Italy_BOLD_AAN1521
IBIHP042-20_Aquarius_najas_Portugal_BOLD_AAN1521
BCEAB033-16_Aquarius_najas_Italy_BOLD_AAN1521
Species 65:
PLHET022-21_Aquarius_paludum_Poland_BOLD_AAI7450
PLHET001-21_Aquarius_paludum_Poland_BOLD_AAI7450
GBMHH26917-19_Aquarius_paludum_France_BOLD_AAI7450
BCEAB256-16_Aquarius_paludum_Germany_BOLD_AAI7450
BCEAB255-16_Aquarius_paludum_Germany_BOLD_AAI7450
BCEAB582-17_Aquarius_paludum_Germany_BOLD_AAI7450
BCEAB254-16_Aquarius_paludum_Germany_BOLD_AAI7450
MOHET072-20_Aquarius_paludum_Montenegro_BOLD_AAI7450
BCEAB064-16_Aquarius_paludum_Germany_BOLD_AAI7450
MOHET161-20_Aquarius_paludum_Montenegro_BOLD_AAI7450
MOHET101-20_Aquarius_paludum_Albania_BOLD_AAI7450
MOHET099-20_Aquarius_paludum_Albania_BOLD_AAI7450
MOHET171-21_Aquarius_paludum_Albania_BOLD_AAI7450
PLHET002-21_Aquarius_paludum_Poland_BOLD_AAI7450
BCEAB257-16_Aquarius_paludum_Germany_BOLD_AAI7450
BCEAB258-16_Aquarius_paludum_Germany_BOLD_AAI7450
BCEAB066-16_Aquarius_paludum_Italy_BOLD_AAI7450
MOHET172-21_Aquarius_paludum_Albania_BOLD_AAI7450
IBIHP008-19_Aquarius_paludum_Portugal_BOLD_AAI7450
MOHET087-20_Aquarius_paludum_Montenegro_BOLD_AAI7450
PGCBG5710-20_Aquarius_paludum_Montenegro_BOLD_AAI7450
FBAQU078-09_Aquarius_paludum_Germany_BOLD_AAI7450
MOHET165-20_Aquarius_paludum_Montenegro_BOLD_AAI7450
MOHET166-20_Aquarius_paludum_Albania_BOLD_AAI7450
BCEAB253-16_Aquarius_paludum_Germany_BOLD_AAI7450
MOHET100-20_Aquarius_paludum_Albania_BOLD_AAI7450
MOHET107-20_Aquarius_paludum_Albania_BOLD_AAI7450
BCEAB262-16_Aquarius_paludum_Germany_BOLD_AAI7450
PLHET003-21_Aquarius_paludum_Poland_BOLD_AAI7450
MOHET071-20_Aquarius_paludum_Montenegro_BOLD_AAI7450
BCEAB264-16_Aquarius_paludum_Germany_BOLD_AAI7450
BCEAB263-16_Aquarius_paludum_Germany_BOLD_AAI7450
FBAQU698-10_Aquarius_paludum_Germany_BOLD_AAI7450
MOHET086-20_Aquarius_paludum_Montenegro_BOLD_AAI7450
BCEAB260-16_Aquarius_paludum_Germany_BOLD_AAI7450
BCEAB261-16_Aquarius_paludum_Germany_BOLD_AAI7450
BCEAB581-17_Aquarius_paludum_Germany_BOLD_AAI7450
BCEAB259-16_Aquarius_paludum_Germany_BOLD_AAI7450
BCEAB065-16_Aquarius_paludum_Germany_BOLD_AAI7450
