# Supplementary material for: DNA barcode-based survey documents underestimated diversity and intricate phylogeographic patterns of aquatic Heteroptera in an endangered Balkan biodiversity hotspot: ancient Lake Skadar basin
Source: Research Square preprint supplement (doi:10.21203/rs.3.rs-3163326/v1), 2023-07-13
Supplement: Supplementary file 2 [file 4152ebbe0eaf6a81a8230f64.xlsx]

## Sheet: Table S2
Supplementary information to:
DNA barcode-based survey documents underestimated diversity and intricate phylogeographic patterns of aquatic Heteroptera in an endangered Balkan biodiversity hotspot: ancient Lake Skadar basin
Tomasz Rewicz, Grzegorz Tończyk, Łukasz Trębicki, Piotr Gadawski, Tomasz Mamos, Vladimir Pešić, Andrzej Zawal, Michał Grabowski
Table S2 Overview of sampling sites and number and diversity of water bug samples. Barcoded individuals indicated in black font
				Gerridae
Site	Data	Latitude	Longitude	Aquarius najas													Aquarius paludum												Gerris argentatus				Gerris costae
Individual				MOHET187-21	MOHET186-21	MOHET219-21	MOHET218-21	MOHET217-21	MOHET216-21	MOHET075-20	MOHET073-20	MOHET104-20	MOHET076-20	MOHET074-20	MOHET157-20	MOHET156-20	MOHET172-21	MOHET171-21	MOHET087-20	MOHET161-20	MOHET072-20	MOHET101-20	MOHET100-20	MOHET099-20	MOHET086-20	MOHET071-20	MOHET166-20	MOHET165-20	MOHET084-20	MOHET085-20	MOHET047-20	MOHET049-20	MOHET177-21	MOHET176-21	MOHET175-21	MOHET174-21	MOHET173-21	MOHET038-20	MOHET037-20	MOHET149-20	MOHET150-20	MOHET155-20	MOHET154-20	MOHET153-20	MOHET151-20	MOHET148-20	TRSKA3611-20	TRSKA3616-20	TRSKA3610-20
PLAVNICA BASEN LIGHT 1	06.05.2018	42.273	19.201
TOY LIGHT PLAV	06.05.2018	42.346	19.179
ASL6	30.09.2014	42.46297	19.30866
ASL7	30.09.2014	42.42839	19.29966
ASL8	30.09.2014	42.42802	19.48476
ASL9	30.09.2014	42.4241	19.46062
ASL11	10.02.2014	42.30954	19.05182
ASL12	10.02.2014	42.30612	42.30612
ASL13	10.02.2014	42.306116	42.306116
ASL16	10.09.2014	42.35361	19.00972
ASL17	10.02.2014	42.35867	19.10632
ASL18	10.02.2014	42.32805	19.13354
ASL19	10.02.2014	42.35867	19.10632
ASL22	10.04.2014	42.23	19.0675
ASL24	10.04.2014	42.22639	19.06639		1M
ASL25	10.04.2014	42.22167	19.05889	1M
ASL26	10.04.2014	42.21111	19.055
ASL27	10.04.2014	42.21333	19.05222
ASL31	10.04.2014	42.2272	19.0669
ASL33	10.04.2014	42.2264	19.0664
ASL40	10.07.2014	42.275	19.395
ASL41	29.09.2014	42.4844	19.1225
ASL42	29.09.2014	42.4844	19.1225
ASL43	10.04.2014	42.2111	19.055
ASLN4	10.03.2014	42.29139	19.11187
ASLN5	10.03.2014	42.2957	19.08353
SSL03	27.04.2014	42.34389	19.31194
SSL04	28.04.2014	42.2725	19.20056
SSL05	28.04.2014	42.36611	19.155
SSL06	28.04.2014	42.35861	19.10611
SSL09	30.04.2014	42.27667	19.14667
SSL11	30.04.2014	42.16306	19.22194
SSL12	01.05.2014	42.27139	19.39278
SSL13	01.05.2014	42.17694	19.43306
SSL14	01.05.2014	42.05361	19.47917
SSL17	03.05.2014	42.30917	19.05167			1M	1M	1F	1F
SSL18	03.05.2014	42.30639	19.05361
SSL19	03.05.2014	42.32861	19.13583
SSL26	05.05.2014	42.48437	19.15378
SSL27	05.05.2014	42.48446	19.12253
SSL28	05.05.2014	42.47095	19.13864
SSL32	05.06.2014	42.20472	19.19028
SSL40	05.07.2014	42.24029	19.16179
SSL49	05.08.2014	42.29944	19.10972
SSL60	05.07.2014	42.22472	19.17611
SSL62	05.06.2014	42.20417	19.19
SSL63	05.06.2014	42.20472	19.19028
SSL66	05.06.2014	42.22055	19.20694
SSL68	05.06.2014	42.23297	19.17340
SSL69	05.06.2014	42.23919	19.17310
SSL70	05.06.2014	42.22694	19.1725
SSL71	05.06.2014	42.22583	19.16083
SSL72	05.06.2014	42.41361	19.36083
SSL73	05.06.2014	42.23361	19.15222
SSL74	05.06.2014	42.23444	19.193056
SSL75	05.06.2014	42.23528	19.16722
SSL76	05.06.2014	42.23583	19.1675
SSL77	05.06.2014	42.2525	19.10083
SSL78	05.06.2014	42.39139	19.27944
SSL80	05.06.2014	42.22556	19.16028
SSL82	05.07.2014	42.05067	19.15025
SSL90	05.07.2014	42.22574	19.16068
SSL92	05.08.2014	42.11854	19.08555
SSL95	05.08.2014	42.28107	19.1398
SSL96	05.08.2014	42.2212	19.08149
TOY01	28.05.2018	42.228	19.067
TOY04	29.05.2018	42.80022	19.23761																																1F	1F	1F		1M	1F						1M
TOY05	29.05.2018	42.80382	19.22737																																			1F
TOY06	29.05.2018	42.8046	19.2153																																												1	1	1
TOY07	29.05.2018	42.81094	19.18553																														1F	1M							1M				1M
TOY08	30.05.2018	42.76389	18.95866																																							1M	1F	1M
TOY09	30.05.2018	42.81098	18.92623
TOY14	31.05.2018	42.30595	19.05363																												1F	1F
TOY15	31.05.2018	42.3087	19.05206												1L	1M
TOY16	31.05.2018	42.31877	19.0337							1F	1M		1F	1M							1F					1F
TOY17	31.05.2018	42.35682	19.01405
TOY18	01.06.2018	42.36578	19.15458																1M	1M					1M				1M	1M
TOY19	01.06.2018	42.37148	19.14755
TOY20	02.06.2018	42.35755	19.10676																									1L
TOY21	05.06.2018	42.12508	19.58182														1M	1F									1M
TOY22	05.06.2018	42.13812	19.63205
TOY23	05.06.2018	42.19143	19.71503									1L										1M	1F	1F
TOY24	05.06.2018	42.21148	19.70823
TOY25	05.06.2018	42.1956	19.70882
TOY26	07.06.2018	42.34621	19.17847
KIA01	28.05.2018	42.51098	19.19921
KIA02	28.05.2018	42.51098	19.19921
KIA06	29.05.2018	42.48339	19.24291
KIA10	30.05.2018	42.48	19.18194
KIA12	31.05.2018	42.48611	19.17361
KIA16	03.06.2018	42.08917	19.33972
KIA17	03.06.2018	42.12611	19.25778
CIT10	30.05.2018	42.28863	19.25631
CIT12	30.05.2018	42.32542	19.36258
CIT14	30.05.2018	42.46849	19.28343
CIT22	05.06.2018	42.35454	19.63299
CIT23	05.06.2018	42.36092	19.63303
LSLRZ2	21.07.2015	42.27247	19.20120
LSLRZ13	27.07.2015	42.33519	18.77245
LSLRZ16	29.07.2015	42.35308	19.01003
LSLRZ20	07.2015	42.3531	19.01
Karuc	02.10.2014	42.35861	19.10611
[truncated: 184 more columns]
