# Supplementary material for: DNA barcode-based survey documents underestimated diversity and intricate phylogeographic patterns of aquatic Heteroptera in an endangered Balkan biodiversity hotspot: ancient Lake Skadar basin
Source: Research Square preprint supplement (doi:10.21203/rs.3.rs-3163326/v1), 2023-07-13
Supplement: Supplementary file 2 [file aec6c02f9098fa6ad0b0adbe.docx]

Table 1. BOLD distance analysis for the studied Gerromorpha and Nepomorpha.

| **Infraorder** | **Family** | **Species** | **N** | **BIN** | **Mean** | | **Max** |  | **Nearest Species** | **DNN** | |
| --- | --- | --- | --- | --- | --- | --- | --- | --- | --- | --- | --- |
|  |  |  |  |  | **K2P** | **p-dist** | **K2P** | **p-dist** |  | **K2P** | **p-dist** |
| Gerromorpha | Gerridae | *Aquarius najas* (De Geer 1773) | 13 | AAN1521 | 0 | 0 | 0 | 0 | *Gerris thoracicus* | 11.86 | 10.97 |
|  |  | *Aquarius paludum* (Fabricius 1794)*#* | 13 | AAI7450 | 0.75 | 0.74 | 1.31 | 1.3 | *Gerris argentatus* | 12.15 | 11.22 |
|  |  | *Gerris argentatus* Schummel 1832 | 4 | ADD1846 | 0.3 | 0.3 | 0.49 | 0.49 | *Gerris costae* | 7.9 | 7.48 |
|  |  | *Gerris costae* (Herrich-Schaeffer 1850) | 16 | ACI6181 | 0 | 0 | 0 | 0 | *Gerris thoracicus* | 7.63 | 7.19 |
|  |  | *Gerris lacustris* (Linnaeus 1758) | 8 | ACT3584 | 0.63 | 0.62 | 1.52 | 1.51 | *Gerris argentatus* | 9 | 8.46 |
|  |  | *Gerris lateralis* Schummel 1832*** | 5 | ABA3327 | 0.22 | 0.22 | 0.33 | 0.33 | *Gerris argentatus* | 12.36 | 11.38 |
|  |  | *Gerris thoracicus* Schummel 1832 | 6 | ACB1745 | 0.05 | 0.05 | 0.16 | 0.16 | *Gerris costae* | 7.63 | 7.19 |
|  | Veliidae | *Velia affinis* Kolenati 1857*#* | 16 | AEG0715 | 0.33 | 0.33 | 1.58 | 1.55 | *Velia sp.* | 10.95 | 10.13 |
|  |  | *Velia sp.* | 3 | AEF9274 | 0 | 0 | 0 | 0 | *Velia affinis* | 10.95 | 10.13 |
|  | Hydrometridae | *Hydrometra stagnorum* (Linnaeus 1758) | 12 |  | 3.3 | 3.14 | **6.08** | **5.74** | *Gerris argentatus* | 19.17 | 16.91 |
|  |  |  | 6 | AAK5632 | 0.44 | 0.44 | 0.92 | 0.91 |  |  |  |
|  |  |  | 6 | AEC2693 | 0.43 | 0.42 | 0.83 | 0.82 |  |  |  |
| Nepomorpha | Belostomatidae | *Lethocerus patruelis* (Stål 1854) | 1 | N/A | N/A | N/A | N/A | N/A | N/A | N/A | N/A |
|  | Corixidae | *Hesperocorixa linnaei* (Fieber 1848) | 4 | ABX0448 | 0.58 | 0.57 | 1.15 | 1.14 | *Hesperocorixa sahlbergi* | 14.9 | 13.4 |
|  |  | *Hesperocorixa sahlbergi* (Fieber 1848)**#* | 16 | AEF2957 | 0.2 | 0.19 | 0.5 | 0.49 | *Sigara dorsalis* | 14.51 | 13.11 |
|  |  | *Micronecta poweri* (Douglas & Scott 1869)*** | 4 | AET | 0.25 | 0.25 | 0.36 | 0.36 | *Nepa cinerea* | 18.44 | 16.31 |
|  |  | *Micronecta pusilla* (Horváth 1895)***#* | 13 | AEG9578 | 0.31 | 0.31 | 0.99 | 0.98 | *Ilyocoris cimicoides* | 20.15 | 17.63 |
|  |  | *Sigara scripta* (Rambur 1840) | 2 | AEI1642 | 0.17 | 0.17 | 0.17 | 0.17 | *Sigara dorsalis* | 11.84 | 10.79 |
|  |  | *Sigara dorsalis* (Leach 1817) | 36 | AAJ6688 | 0.13 | 0.13 | 0.66 | 0.66 | *Sigara scripta* | 11.7 | 10.79 |
|  | Nepidae | *Nepa cinerea* (Linnaeus 1758) | 5 |  | 2.05 | 2 | **3.45** | **3.34** | *Notonecta maculata* | 16.68 | 14.93 |
|  |  |  | 2 | AAK8359 | 0.61 | 0.61 | 0.61 | 0.61 |  |  |  |
|  |  |  | 3 | AEH5788 | 0.81 | 0.8 | 1.07 | 1.06 |  |  |  |
|  |  | *Ranatra linearis* (Linnaeus 1758) | 3 | AAL1328 | 0 | 0 | 0 | 0 | *Notonecta glauca* | 17.65 | 15.7 |
|  | Notonectidae | *Anisops sardeus* Herrich-Schäffer 1850 | 2 | ABV0079 | 1.08 | 1.06 | 1.08 | 1.06 | *Notonecta glauca* | 13.96 | 12.68 |
|  |  | *Notonecta glauca* Linnaeus 1758 | 7 | AAK4442 | 0.47 | 0.47 | 1.08 | 1.06 | *Notonecta viridis* | 5.61 | 5.4 |
|  |  | *Notonecta maculata* Fabricius 1794 | 19 |  | 0.16 | 0.16 | 1.25 | 1.24 | *Notonecta glauca* | 6.91 | 6.59 |
|  |  |  | 18 | AEF8405 | 0.04 | 0.04 | 0.36 | 0.36 |  |  |  |
|  |  |  | 1 | AEH5379 | N/A | N/A | 0 | 0 |  |  |  |
|  |  | *Notonecta viridis* Delcourt 1909*** | 1 | ABV0133 | N/A | N/A | 0 | 0 | *Notonecta glauca* | 5.61 | 5.4 |
|  | Pleidae | *Plea minutissima* (Leach 1817) | 3 | AAF3832 | 0.22 | 0.22 | 0.33 | 0.33 | *Notonecta glauca* | 11.49 | 10.59 |
|  | Naucoridae | *Ilyocoris cimicoides* (Linnaeus 1758) | 7 | AAF2590 | 0.82 | 0.81 | 1.51 | 1.49 | *Notonecta glauca* | 16.76 | 14.95 |

Notes:

(N) number of analysed specimens, (BIN) barcode index number, (Mean) mean intraspecific pairwise K2P, and p-distances, (Max) maximum intraspecific pairwise K2P, and p-distances, (DNN) minimum interspecific pairwise K2P, and p-distances to the nearest neighbour species. Maximum intraspecific distances >2.2% are marked in bold. One asterisks (*) indicate species not recorded for Montenegro, two asterix (**) indicate species not recorded for Albania. Hash (#) indicate species not recorded for the Skadar Lake before. *Red – BINs new to BOLD*
