# Supplementary material for: DNA barcode-based survey documents underestimated diversity and intricate phylogeographic patterns of aquatic Heteroptera in an endangered Balkan biodiversity hotspot: ancient Lake Skadar basin
Source: Research Square preprint supplement (doi:10.21203/rs.3.rs-3163326/v1), 2023-07-13
Supplement: Supplementary file 4 [file f6052f088ea6c4c4926a3e50.xlsx]

## Sheet: Table S1
Supplementary information to:
DNA barcode-based survey documents underestimated diversity and intricate phylogeographic patterns of aquatic Heteroptera in an endangered Balkan biodiversity hotspot: ancient Lake Skadar basin
Tomasz Rewicz, Grzegorz Tończyk, Łukasz Trębicki, Piotr Gadawski, Tomasz Mamos, Vladimir Pešić, Andrzej Zawal, Michał Grabowski
Table S1 Sample overview, Process ID, Sample ID, locality data, GenBank accession numbers, BINs, place for DNA deposited, notes
Species	Process ID	Sample ID	Locality	Country	Latitude	Longitude	Date	Altitude [m asl]	COI	BIN	DNA deposited	Notes
Sigara dorsalis	MOHET184-21	ASL_11	Karuc	Montenegro	42.3587	19.1063	02-Oct-2014	17	ON406802	BOLD:AAJ6688	UniLodz
Sigara dorsalis	MOHET185-21	ASL_22	Virpazar, Modra oka	Montenegro	42.2904	19.0921	03-Oct-2014	1	ON406740	BOLD:AAJ6688	UniLodz
Aquarius najas	MOHET186-21	ASL_24	Opstina Bar, Donji Murici,	Montenegro	42.1632	19.2221	05-Oct-2014	8	ON406772	BOLD:AAN1521	UniLodz
Aquarius najas	MOHET187-21	ASL_25	Opstina Bar, Donji Murici,	Montenegro	42.1632	19.2221	05-Oct-2014	8	ON406681	BOLD:AAN1521	UniLodz
Micronecta poweri	MOHET245-21	ASL_27		Montenegro	42.2133	19.0522	01-Jan-2014	21	ON406818	BOLD:ACB1970	UniLodz
Notonecta maculata	MOHET188-21	ASL_31	Sotonici	Montenegro	42.2272	19.0669	04-Oct-2014	11	ON406725	BOLD:AEF8405	UniLodz
Notonecta maculata	MOHET189-21	ASL_33	Sotonici	Montenegro	42.2264	19.0664	04-Oct-2014	21	ON406823	BOLD:AEF8405	UniLodz
Ilyocoris cimicoides	MOHET190-21	ASL_40	Kastrat, Gjiri i Syrit te Sheganit	Albania	42.275	19.395	07-Oct-2014	5	ON406734	BOLD:AAF2590	UniLodz
Sigara scripta	MOHET246-21	ASL_41	Opstina Danilovgrad	Montenegro	42.4844	19.1225	29-Sep-2014	34	ON406651	BOLD:AEI1642	UniLodz
Sigara scripta	MOHET247-21	ASL_42	Opstina Danilovgrad	Montenegro	42.4844	19.1225	29-Sep-2014	34	ON406820	BOLD:AEI1642	UniLodz
Velia affinis	MOHET191-21	ASL_43	Gluhi Do	Montenegro	42.2111	19.055	04-Oct-2014	13	ON406790	BOLD:AEG0715	UniLodz
Ilyocoris cimicoides	MOHET180-21	ASL_6	Karuc	Montenegro	42.3587	19.1063	02-Oct-2014	17	ON406840	BOLD:AAF2590	UniLodz
Ilyocoris cimicoides	MOHET181-21	ASL_7	Karuc	Montenegro	42.3587	19.1063	02-Oct-2014	17	ON406860	BOLD:AAF2590	UniLodz
Sigara dorsalis	MOHET182-21	ASL_8	Karuc	Montenegro	42.3587	19.1063	02-Oct-2014	17	ON406767	BOLD:AAJ6688	UniLodz
Sigara dorsalis	MOHET183-21	ASL_9	Karuc	Montenegro	42.3587	19.1063	02-Oct-2014	17	ON406770	BOLD:AAJ6688	UniLodz
Sigara dorsalis	TRSKA3606-20	BIOUG56543-H07	Drume Vitoja	Montenegro	42.3254	19.3626	30-May-2018	12	ON406773	BOLD:AAJ6688	CCDB
Hesperocorixa sahlbergi	TRSKA3607-20	BIOUG56543-H08	Izvori Gostiljske Rijeke	Montenegro	42.2886	19.2563	30-May-2018	7	ON406676	BOLD:AEF2957	CCDB
Hesperocorixa sahlbergi	TRSKA3608-20	BIOUG56543-H09	Izvori Gostiljske Rijeke	Montenegro	42.2886	19.2563	30-May-2018	7	ON406666	BOLD:AEF2957	CCDB
Hesperocorixa sahlbergi	TRSKA3609-20	BIOUG56543-H10	Izvori Gostiljske Rijeke	Montenegro	42.2886	19.2563	30-May-2018	7	ON406750	BOLD:AEF2957	CCDB
Gerris costae	TRSKA3610-20	BIOUG56543-H11	spring	Montenegro	42.8046	19.2153	29-May-2018	1608	ON406822	BOLD:ACI6181	CCDB
Gerris costae	TRSKA3611-20	BIOUG56544-A01	spring	Montenegro	42.8046	19.2153	29-May-2018	1608	ON406703	BOLD:ACI6181	CCDB
Gerris costae	TRSKA3616-20	BIOUG56544-A06	spring	Montenegro	42.8046	19.2153	29-May-2018	1608	ON406846	BOLD:ACI6181	CCDB
Sigara dorsalis	PGCBG7046-20	BIOUG57601-B04	Plavnica	Montenegro	42.346	19.179	05-Jun-2018	9	ON406855	BOLD:AAJ6688	CCDB
Sigara dorsalis	PGCBG7047-20	BIOUG57601-B05	Plavnica	Montenegro	42.346	19.179	05-Jun-2018	9	ON406662	BOLD:AAJ6688	CCDB
Sigara dorsalis	PGCBG7053-20	BIOUG57601-B11	Plavnica	Montenegro	42.346	19.179	05-Jun-2018	9	ON406688	BOLD:AAJ6688	CCDB
Sigara dorsalis	PGCBG7054-20	BIOUG57601-B12	Plavnica	Montenegro	42.346	19.179	05-Jun-2018	9	ON406722	BOLD:AAJ6688	CCDB
Sigara dorsalis	PGCBG7244-20	BIOUG57603-B12	Plavnica	Montenegro	42.273	19.201	05-Jun-2018	5	ON406797	BOLD:AAJ6688	CCDB
Sigara dorsalis	PGCBG7248-20	BIOUG57603-C04	Plavnica	Montenegro	42.273	19.201	05-Jun-2018	5	ON406668	BOLD:AAJ6688	CCDB
Sigara dorsalis	PGCBG7249-20	BIOUG57603-C05	Plavnica	Montenegro	42.273	19.201	05-Jun-2018	5	ON406730	BOLD:AAJ6688	CCDB
Sigara dorsalis	PGCBG8433-20	BIOUG57605-G01	Plavnica	Montenegro	42.346	19.179	05-Jun-2018	9	ON406685	BOLD:AAJ6688	CCDB
Sigara dorsalis	PGCBG8434-20	BIOUG57605-G02	Plavnica	Montenegro	42.346	19.179	05-Jun-2018	9	ON406786	BOLD:AAJ6688	CCDB
Sigara dorsalis	PGCBG8435-20	BIOUG57605-G03	Plavnica	Montenegro	42.346	19.179	05-Jun-2018	9	ON406686	BOLD:AAJ6688	CCDB
Sigara dorsalis	PGCBG8529-20	BIOUG57606-G02	Plavnica	Montenegro	42.346	19.179	05-Jun-2018	9	ON406663	BOLD:AAJ6688	CCDB
Sigara dorsalis	PGCBG8532-20	BIOUG57606-G05	Plavnica	Montenegro	42.346	19.179	05-Jun-2018	9	ON406782	BOLD:AAJ6688	CCDB
Sigara dorsalis	PGCBG8636-20	BIOUG57607-H02	Plavnica	Montenegro	42.346	19.179	05-Jun-2018	9	ON406787	BOLD:AAJ6688	CCDB
Sigara dorsalis	PGCBG7605-20	BIOUG57641-A05	Plavnica	Montenegro	42.346	19.179	05-Jun-2018	9	ON406842	BOLD:AAJ6688	CCDB
Nepa cinerea	MOHET134-20	HET_CIT_14.1	Zlatica river	Montenegro	42.468	19.283	30-May-2018	55	ON406677	BOLD:AEH5788	UniLodz
Micronecta poweri	MOHET135-20	HET_CIT_14.2	Zlatica river	Montenegro	42.468	19.283	30-May-2018	55	ON406809	BOLD:ACB1970	UniLodz
Notonecta maculata	MOHET137-20	HET_CIT_22.1	Prroni i Thate river	Albania	42.355	19.633	02-Jun-2018	812	ON406833	BOLD:AEF8405	UniLodz
Notonecta maculata	MOHET138-20	HET_CIT_22.2	Prroni i Thate river	Albania	42.355	19.633	03-Jun-2018	812	ON406751	BOLD:AEF8405	UniLodz
Notonecta maculata	MOHET139-20	HET_CIT_22.3	Prroni i Thate river	Albania	42.355	19.633	04-Jun-2018	812	ON406815	BOLD:AEF8405	UniLodz
Notonecta maculata	MOHET248-21	Het_CIT_22.4	Prroni i Thate river	Albania	42.3545	19.633	05-Jun-2018	812	ON406811	BOLD:AEF8405	UniLodz
Notonecta maculata	MOHET249-21	Het_CIT_22.5	Prroni i Thate river	Albania	42.3545	19.633	05-Jun-2018	812	ON406727	BOLD:AEF8405	UniLodz
Notonecta maculata	MOHET250-21	Het_CIT_22.6	Prroni i Thate river	Albania	42.3545	19.633	05-Jun-2018	812	ON406805	BOLD:AEF8405	UniLodz
Notonecta maculata	MOHET251-21	Het_CIT_22.7	Prroni i Thate river	Albania	42.3545	19.633	05-Jun-2018	812	ON406814	BOLD:AEF8405	UniLodz
Notonecta maculata	MOHET140-20	HET_CIT_23.1	pond	Albania	42.361	19.633	05-Jun-2018	851	ON406646	BOLD:AEH5379	UniLodz
Plea minutissima	MOHET144-20	HET_CIT_23.5	pond	Albania	42.361	19.633	05-Jun-2018	851	ON406678	BOLD:AAF3832	UniLodz
Plea minutissima	MOHET145-20	HET_CIT_23.6	pond	Albania	42.361	19.633	05-Jun-2018	851	ON406735	BOLD:AAF3832	UniLodz
Plea minutissima	MOHET146-20	HET_CIT_23.7	pond	Albania	42.361	19.633	05-Jun-2018	851	ON406762	BOLD:AAF3832	UniLodz
Hydrometra stagnorum	MOHET252-21	HET_KIA_1_1	spring at Zeta river near Spuz	Montenegro	42.511	19.1992	28-May-2018	36	ON406813	BOLD:AAK5632	UniLodz
Hydrometra stagnorum	MOHET253-21	HET_KIA_1_2	spring at Zeta river near Spuz	Montenegro	42.511	19.1992	28-May-2018	36	ON406719	BOLD:AAK5632	UniLodz
Hydrometra stagnorum	MOHET254-21	HET_KIA_1_3	spring at Zeta river near Spuz	Montenegro	42.511	19.1992	28-May-2018	36	ON406684	BOLD:AAK5632	UniLodz
Hydrometra stagnorum	MOHET255-21	HET_KIA_1_4	spring at Zeta river near Spuz	Montenegro	42.511	19.1992	28-May-2018	36	ON406707	BOLD:AAK5632	UniLodz
Hesperocorixa sahlbergi	MOHET118-20	HET_KIA_12.4	Kraljicino Oko	Montenegro	42.486	19.174	31-May-2018	38	ON406799	BOLD:AEF2957	UniLodz
Hesperocorixa sahlbergi	MOHET119-20	HET_KIA_12.5	Kraljicino Oko	Montenegro	42.486	19.174	31-May-2018	38	ON406826	BOLD:AEF2957	UniLodz
Hesperocorixa sahlbergi	MOHET121-20	HET_KIA_12(B)_1	Kraljicino Oko	Montenegro	42.486	19.174	31-May-2018	38	ON406825	BOLD:AEF2957	UniLodz
Hesperocorixa sahlbergi	MOHET122-20	HET_KIA_12(B)_2	Kraljicino Oko	Montenegro	42.486	19.174	31-May-2018	38	ON406732	BOLD:AEF2957	UniLodz
Sigara dorsalis	MOHET125-20	HET_KIA_16A.2	Skadar lake Ostrov	Montenegro	42.089	19.34	03-Jun-2018	16	ON406721	BOLD:AAJ6688	UniLodz
Micronecta pusilla	MOHET126-20	HET_KIA_16A.3	Skadar lake Ostrov	Montenegro	42.089	19.34	03-Jun-2018	16	ON406650	BOLD:AEG9578	UniLodz
Micronecta pusilla	MOHET128-20	HET_KIA_16A.5	Skadar lake Ostrov	Montenegro	42.089	19.34	03-Jun-2018	16	ON406839	BOLD:AEG9578	UniLodz
Micronecta pusilla	MOHET129-20	HET_KIA_16A.6	Skadar lake Ostrov	Montenegro	42.089	19.34	03-Jun-2018	16	ON406647	BOLD:AEG9578	UniLodz
Micronecta pusilla	MOHET130-20	HET_KIA_16A.7	Skadar lake Ostrov	Montenegro	42.089	19.34	03-Jun-2018	16	ON406682	BOLD:AEG9578	UniLodz
Ranatra linearis	MOHET131-20	HET_KIA_17.1	water basin near Bobriste	Montenegro	42.126	19.258	03-Jun-2018	4	ON406778	BOLD:AAL1328	UniLodz
Ranatra linearis	MOHET132-20	HET_KIA_17.2	water basin near Bobriste	Montenegro	42.126	19.258	03-Jun-2018	4	ON406713	BOLD:AAL1328	UniLodz
Anisops sardeus	MOHET133-20	HET_KIA_17.3	water basin near Bobriste	Montenegro	42.126	19.258	03-Jun-2018	4	ON406849	BOLD:ABV0079	UniLodz
Anisops sardeus	MOHET256-21	HET_KIA_17.4	water basin near Bobriste	Montenegro	42.1261	19.2578	03-Jun-2018	4	ON406699	BOLD:ABV0079	UniLodz
Nepa cinerea	MOHET257-21	HET_KIA_2A_2	spring at Zeta river near Spuz	Montenegro	42.511	19.1992	28-May-2018	36	ON406714	BOLD:AAK8359	UniLodz
Gerris lateralis	MOHET168-21	HET_KIA_6A.1	second spring at Zeta River near Pricelje	Montenegro	42.483	19.243	29-May-2018	34	ON406737	BOLD:ABA3327	UniLodz
Nepa cinerea	MOHET033-20	HET_TOY_1.1	Crmnica polje	Montenegro	42.228	19.067	28-May-2018	14	ON406810	BOLD:AEH5788	UniLodz
Notonecta glauca	MOHET034-20	HET_TOY_1.2	Crmnica polje	Montenegro	42.228	19.067	28-May-2018	14	ON406838	BOLD:AAK4442	UniLodz
Notonecta maculata	MOHET035-20	HET_TOY_1.3	Crmnica polje	Montenegro	42.228	19.067	28-May-2018	14	ON406697	BOLD:AEF8405	UniLodz
Notonecta maculata	MOHET036-20	HET_TOY_1.4	Crmnica polje	Montenegro	42.228	19.067	28-May-2018	14	ON406652	BOLD:AEF8405	UniLodz
Gerris argentatus	MOHET047-20	HET_TOY_14.1	spring Poseljani	Montenegro	42.306	19.054	31-May-2018	18	ON406812	BOLD:ADD1846	UniLodz
Gerris argentatus	MOHET049-20	HET_TOY_14.3	spring Poseljani	Montenegro	42.306	19.054	31-May-2018	18	ON406807	BOLD:ADD1846	UniLodz
Velia affinis	MOHET054-20	HET_TOY_15_13	Poseljani bridge	Montenegro	42.309	19.052	31-May-2018	58	ON406700	BOLD:AEG0715	UniLodz
Velia affinis	MOHET055-20	HET_TOY_15_14	Poseljani bridge	Montenegro	42.309	19.052	31-May-2018	58	ON406648	BOLD:AEG0715	UniLodz
Velia affinis	MOHET057-20	HET_TOY_15_16	Poseljani bridge	Montenegro	42.309	19.052	31-May-2018	58	ON406754	BOLD:AEG0715	UniLodz
Velia affinis	MOHET156-20	HET_TOY_15.1_1	Poseljani bridge	Montenegro	42.309	19.052	31-May-2018	58	ON406854	BOLD:AEG0715	UniLodz
Aquarius najas	MOHET157-20	HET_TOY_15.2_1	Poseljani bridge	Montenegro	42.309	19.052	31-May-2018	58	ON406785	BOLD:AAN1521	UniLodz
Gerris lateralis	MOHET258-21	HET_TOY_15.3_1	Poseljani bridge	Montenegro	42.309	19.052	31-May-2018	58	ON406728	BOLD:ABA3327	UniLodz
Notonecta maculata	MOHET167-21	HET_TOY_15.4_1	Poseljani bridge	Montenegro	42.309	19.052	31-May-2018	58	ON406649	BOLD:AEF8405	UniLodz
Notonecta maculata	MOHET050-20	HET_TOY_15.5_1	Poseljani bridge	Montenegro	42.309	19.052	31-May-2018	58	ON406758	BOLD:AEF8405	UniLodz
Aquarius najas	MOHET158-20	HET_TOY_15.9_1	Poseljani bridge	Montenegro	42.309	19.052	31-May-2018	58	ON406712	BOLD:AAN1521	UniLodz
Velia affinis	MOHET067-20	HET_TOY_16.10	Spring Zajcina	Montenegro	42.319	19.034	31-May-2018	164	ON406683	BOLD:AEG0715	UniLodz
Velia affinis	MOHET068-20	HET_TOY_16.11	Spring Zajcina	Montenegro	42.319	19.034	31-May-2018	164	ON406679	BOLD:AEG0715	UniLodz
Velia affinis	MOHET069-20	HET_TOY_16.12	Spring Zajcina	Montenegro	42.319	19.034	31-May-2018	164	ON406736	BOLD:AEG0715	UniLodz
Aquarius paludum	MOHET071-20	HET_TOY_16.14	Spring Zajcina	Montenegro	42.319	19.034	31-May-2018	164	ON406711	BOLD:AAI7450	UniLodz
Aquarius paludum	MOHET072-20	HET_TOY_16.15	Spring Zajcina	Montenegro	42.319	19.034	31-May-2018	164	ON406795	BOLD:AAI7450	UniLodz
Aquarius najas	MOHET073-20	HET_TOY_16.16	Spring Zajcina	Montenegro	42.319	19.034	31-May-2018	164	ON406706	BOLD:AAN1521	UniLodz
Aquarius najas	MOHET074-20	HET_TOY_16.17	Spring Zajcina	Montenegro	42.319	19.034	31-May-2018	164	ON406670	BOLD:AAN1521	UniLodz
Aquarius najas	MOHET075-20	HET_TOY_16.18	Spring Zajcina	Montenegro	42.319	19.034	31-May-2018	164	ON406687	BOLD:AAN1521	UniLodz
Aquarius najas	MOHET076-20	HET_TOY_16.19	Spring Zajcina	Montenegro	42.319	19.034	31-May-2018	164	ON406749	BOLD:AAN1521	UniLodz
Hydrometra stagnorum	MOHET059-20	HET_TOY_16.2	Spring Zajcina	Montenegro	42.319	19.034	31-May-2018	164	ON406845	BOLD:AEC2693	UniLodz
Gerris lacustris	MOHET078-20	HET_TOY_16.21	Spring Zajcina	Montenegro	42.319	19.034	31-May-2018	164	ON406784	BOLD:ACT3584	UniLodz
Hydrometra stagnorum	MOHET060-20	HET_TOY_16.3	Spring Zajcina	Montenegro	42.319	19.034	31-May-2018	164	ON406831	BOLD:AEC2693	UniLodz
Notonecta viridis	MOHET061-20	HET_TOY_16.4	Spring Zajcina	Montenegro	42.319	19.034	31-May-2018	164	ON406792	BOLD:ABV0133	UniLodz
Notonecta glauca	MOHET062-20	HET_TOY_16.5	Spring Zajcina	Montenegro	42.319	19.034	31-May-2018	164	ON406829	BOLD:AAK4442	UniLodz
Notonecta maculata	MOHET064-20	HET_TOY_16.7	Spring Zajcina	Montenegro	42.319	19.034	31-May-2018	164	ON406791	BOLD:AEF8405	UniLodz
Velia affinis	MOHET065-20	HET_TOY_16.8	Spring Zajcina	Montenegro	42.319	19.034	31-May-2018	164	ON406698	BOLD:AEG0715	UniLodz
Velia affinis	MOHET066-20	HET_TOY_16.9	Spring Zajcina	Montenegro	42.319	19.034	31-May-2018	164	ON406752	BOLD:AEG0715	UniLodz
Velia affinis	MOHET159-20	HET_TOY_17.1_1	Rijeka Crnojevica	Montenegro	42.357	19.014	31-May-2018	26	ON406827	BOLD:AEG0715	UniLodz
Velia affinis	MOHET160-20	HET_TOY_17.2_1	Rijeka Crnojevica	Montenegro	42.357	19.014	31-May-2018	26	ON406760	BOLD:AEG0715	UniLodz
Velia affinis	MOHET079-20	HET_TOY_17.3_1	Rijeka Crnojevica	Montenegro	42.357	19.014	31-May-2018	26	ON406753	BOLD:AEG0715	UniLodz
Velia affinis	MOHET080-20	HET_TOY_17.4	Rijeka Crnojevica	Montenegro	42.357	19.014	31-May-2018	26	ON406746	BOLD:AEG0715	UniLodz
Velia affinis	MOHET081-20	HET_TOY_17.5	Rijeka Crnojevica	Montenegro	42.357	19.014	31-May-2018	26	ON406755	BOLD:AEG0715	UniLodz
Aquarius paludum	MOHET087-20	HET_TOY_18.10	Spring Sinjac	Montenegro	42.366	19.155	01-Jun-2018	11	ON406800	BOLD:AAI7450	UniLodz
Gerris thoracicus	MOHET088-20	HET_TOY_18.11	Spring Sinjac	Montenegro	42.366	19.155	01-Jun-2018	11	ON406664	BOLD:ACB1745	UniLodz
Sigara dorsalis	MOHET089-20	HET_TOY_18.12	Spring Sinjac	Montenegro	42.366	19.155	01-Jun-2018	11	ON406763	BOLD:AAJ6688	UniLodz
Aquarius paludum	MOHET161-20	HET_TOY_18.2_1	Spring Sinjac	Montenegro	42.366	19.155	01-Jun-2018	11	ON406667	BOLD:AAI7450	UniLodz
Sigara dorsalis	MOHET162-20	HET_TOY_18.5_1	Spring Sinjac	Montenegro	42.366	19.155	01-Jun-2018	11	ON406709	BOLD:AAJ6688	UniLodz
Gerris argentatus	MOHET084-20	HET_TOY_18.7	Spring Sinjac	Montenegro	42.366	19.155	01-Jun-2018	11	ON406775	BOLD:ADD1846	UniLodz
Gerris argentatus	MOHET085-20	HET_TOY_18.8	Spring Sinjac	Montenegro	42.366	19.155	01-Jun-2018	11	ON406689	BOLD:ADD1846	UniLodz
Aquarius paludum	MOHET086-20	HET_TOY_18.9	Spring Sinjac	Montenegro	42.366	19.155	01-Jun-2018	11	ON406794	BOLD:AAI7450	UniLodz
Gerris lateralis	MOHET163-20	HET_TOY_19.1_1	Spring Kalubur	Montenegro	42.371	19.148	01-Jun-2018	9	ON406644	BOLD:ABA3327	UniLodz
Gerris lateralis	MOHET164-20	HET_TOY_19.2_1	Spring Kalubur	Montenegro	42.371	19.148	01-Jun-2018	9	ON406857	BOLD:ABA3327	UniLodz
Gerris lateralis	MOHET169-21	HET_TOY_19.3_1	Spring Kalubur	Montenegro	42.371	19.148	01-Jun-2018	9	ON406793	BOLD:ABA3327	UniLodz
Velia sp.	MOHET090-20	HET_TOY_19.4_1	Spring Kalubur	Montenegro	42.371	19.148	01-Jun-2018	9	ON406656	BOLD:AEF9274	UniLodz
Velia sp.	MOHET170-21	HET_TOY_19.6_1	Spring Kalubur	Montenegro	42.371	19.148	01-Jun-2018	9	ON406716	BOLD:AEF9274	UniLodz
Velia sp.	MOHET091-20	HET_TOY_19.7	Spring Kalubur	Montenegro	42.371	19.148	01-Jun-2018	9	ON406675	BOLD:AEF9274	UniLodz
Hesperocorixa linnaei	MOHET096-20	HET_TOY_20_5	Spring Karuc	Montenegro	42.358	19.107	02-Jun-2018	13	ON406832	BOLD:ABX0448	UniLodz
Aquarius paludum	MOHET165-20	HET_TOY_20.1_1	Spring Karuc	Montenegro	42.358	19.107	02-Jun-2018	13	ON406783	BOLD:AAI7450	UniLodz
Ilyocoris cimicoides	MOHET095-20	HET_TOY_20.4_1	Spring Karuc	Montenegro	42.358	19.107	02-Jun-2018	13	ON406835	BOLD:AAF2590	UniLodz
Aquarius paludum	MOHET171-21	HET_TOY_21.1_1	River Kiri	Albania	42.125	19.582	05-Jun-2018	54	ON406731	BOLD:AAI7450	UniLodz
Aquarius paludum	MOHET172-21	HET_TOY_21.2_1	River Kiri	Albania	42.125	19.582	05-Jun-2018	54	ON406806	BOLD:AAI7450	UniLodz
Aquarius paludum	MOHET166-20	HET_TOY_21.3_1	River Kiri	Albania	42.125	19.582	05-Jun-2018	54	ON406766	BOLD:AAI7450	UniLodz
Notonecta glauca	MOHET098-20	HET_TOY_22.1	River Kiri	Albania	42.125	19.582	05-Jun-2018	54	ON406780	BOLD:AAK4442	UniLodz
Aquarius paludum	MOHET099-20	HET_TOY_23.1	Stream near Prekal	Albania	42.191	19.715	05-Jun-2018	226	ON406715	BOLD:AAI7450	UniLodz
Aquarius paludum	MOHET100-20	HET_TOY_23.2	Stream near Prekal	Albania	42.191	19.715	05-Jun-2018	226	ON406764	BOLD:AAI7450	UniLodz
Aquarius paludum	MOHET101-20	HET_TOY_23.3	Stream near Prekal	Albania	42.191	19.715	05-Jun-2018	226	ON406759	BOLD:AAI7450	UniLodz
Gerris lacustris	MOHET102-20	HET_TOY_23.4	Stream near Prekal	Albania	42.191	19.715	05-Jun-2018	226	ON406720	BOLD:ACT3584	UniLodz
Gerris lacustris	MOHET103-20	HET_TOY_23.5	Stream near Prekal	Albania	42.191	19.715	05-Jun-2018	226	ON406704	BOLD:ACT3584	UniLodz
Aquarius najas	MOHET104-20	HET_TOY_23.6	Stream near Prekal	Albania	42.191	19.715	05-Jun-2018	226	ON406848	BOLD:AAN1521	UniLodz
Notonecta glauca	MOHET105-20	HET_TOY_24.1	stream	Albania	42.211	19.708	05-Jun-2018	317	ON406723	BOLD:AAK4442	UniLodz
Velia affinis	MOHET106-20	HET_TOY_24.2	stream	Albania	42.211	19.708	05-Jun-2018	317	ON406672	BOLD:AEG0715	UniLodz
Aquarius paludum	MOHET107-20	HET_TOY_24.3	stream	Albania	42.211	19.708	05-Jun-2018	317	ON406756	BOLD:AAI7450	UniLodz
Hydrometra stagnorum	MOHET108-20	HET_TOY_24.4	stream	Albania	42.211	19.708	05-Jun-2018	317	ON406692	BOLD:AAK5632	UniLodz
Sigara dorsalis	MOHET114-20	HET_TOY_26.5	Malo Blato	Montenegro	42.346	19.178	07-Jun-2018	4	ON406769	BOLD:AAJ6688	UniLodz
Gerris costae	MOHET148-20	HET_TOY_4.1_1	stream	Montenegro	42.8	19.238	29-May-2018	1527	ON406808	BOLD:ACI6181	UniLodz
Gerris costae	MOHET149-20	HET_TOY_4.2_1	stream	Montenegro	42.8	19.238	29-May-2018	1527	ON406850	BOLD:ACI6181	UniLodz
Gerris costae	MOHET037-20	HET_TOY_4.3_1	stream	Montenegro	42.8	19.238	29-May-2018	1527	ON406851	BOLD:ACI6181	UniLodz
Gerris costae	MOHET173-21	HET_TOY_4.4	stream	Montenegro	42.8	19.238	29-May-2018	1527	ON406765	BOLD:ACI6181	UniLodz
Gerris costae	MOHET174-21	HET_TOY_4.5	stream	Montenegro	42.8	19.238	29-May-2018	1527	ON406655	BOLD:ACI6181	UniLodz
Gerris costae	MOHET175-21	HET_TOY_4.6	stream	Montenegro	42.8	19.238	29-May-2018	1527	ON406834	BOLD:ACI6181	UniLodz
Gerris costae	MOHET038-20	HET_TOY_5.1	spring	Montenegro	42.804	19.227	29-May-2018	1610	ON406738	BOLD:ACI6181	UniLodz
Gerris costae	MOHET150-20	HET_TOY_7.1_1	stream	Montenegro	42.811	19.186	29-May-2018	1494	ON406817	BOLD:ACI6181	UniLodz
Gerris costae	MOHET151-20	HET_TOY_7.2_1	stream	Montenegro	42.811	19.186	29-May-2018	1494	ON406695	BOLD:ACI6181	UniLodz
Gerris costae	MOHET176-21	HET_TOY_7.4	stream	Montenegro	42.811	19.186	29-May-2018	1494	ON406828	BOLD:ACI6181	UniLodz
Gerris costae	MOHET177-21	HET_TOY_7.5	stream	Montenegro	42.811	19.186	29-May-2018	1494	ON406718	BOLD:ACI6181	UniLodz
Nepa cinerea	MOHET178-21	HET_TOY_7.6	stream	Montenegro	42.811	19.186	29-May-2018	1494	ON406803	BOLD:AEH5788	UniLodz
Gerris costae	MOHET153-20	HET_TOY_8.1_1	stream Niksic	Montenegro	42.764	18.959	30-May-2018	643	ON406859	BOLD:ACI6181	UniLodz
Gerris thoracicus	MOHET044-20	HET_TOY_8.10	stream Niksic	Montenegro	42.764	18.959	30-May-2018	643	ON406680	BOLD:ACB1745	UniLodz
Gerris costae	MOHET154-20	HET_TOY_8.2_1	stream Niksic	Montenegro	42.764	18.959	30-May-2018	643	ON406696	BOLD:ACI6181	UniLodz
Gerris thoracicus	MOHET155-20	HET_TOY_8.3_1	stream Niksic	Montenegro	42.764	18.959	30-May-2018	643	ON406774	BOLD:ACB1745	UniLodz
Notonecta glauca	MOHET039-20	HET_TOY_8.4_1	stream Niksic	Montenegro	42.764	18.959	30-May-2018	643	ON406819	BOLD:AAK4442	UniLodz
Notonecta glauca	MOHET040-20	HET_TOY_8.5_1	stream Niksic	Montenegro	42.764	18.959	30-May-2018	643	ON406659	BOLD:AAK4442	UniLodz
Notonecta glauca	MOHET179-21	HET_TOY_8.6_1	stream Niksic	Montenegro	42.764	18.959	30-May-2018	643	ON406836	BOLD:AAK4442	UniLodz
Gerris thoracicus	MOHET041-20	HET_TOY_8.7	stream Niksic	Montenegro	42.764	18.959	30-May-2018	643	ON406861	BOLD:ACB1745	UniLodz
Gerris thoracicus	MOHET042-20	HET_TOY_8.8	stream Niksic	Montenegro	42.764	18.959	30-May-2018	643	ON406801	BOLD:ACB1745	UniLodz
Gerris thoracicus	MOHET043-20	HET_TOY_8.9	stream Niksic	Montenegro	42.764	18.959	30-May-2018	643	ON406844	BOLD:ACB1745	UniLodz
Micronecta poweri	MOHET045-20	HET_TOY_9.1	river in Brezovik	Montenegro	42.811	18.926	30-May-2018	619	ON406673	BOLD:ACB1970	UniLodz
Micronecta poweri	MOHET046-20	HET_TOY_9.2	river in Brezovik	Montenegro	42.811	18.926	30-May-2018	619	ON406653	BOLD:ACB1970	UniLodz
Notonecta maculata	MOHET063-20	HET_TOY-16.6	Spring Zajcina	Montenegro	42.319	19.034	31-May-2018	164	ON406847	BOLD:AEF8405	UniLodz
Ilyocoris cimicoides	MOHET235-21	LSL Z18_1	Rogani	Montenegro	42.3586	19.1061	25-Jul-2015	16	ON406705	BOLD:AAF2590	UniLodz
Notonecta maculata	MOHET243-21	LSLRZ13_1	Podlastva	Montenegro	42.3352	18.7724	27-Jul-2015	38	ON406671	BOLD:AEF8405	UniLodz
Notonecta maculata	MOHET244-21	LSLRZ13_2	Podlastva	Montenegro	42.3352	18.7724	27-Jul-2015	38	ON406742	BOLD:AEF8405	UniLodz
Hydrometra stagnorum	MOHET233-21	LSLRZ16_1	Rijeka Crnojevica, Cetinje	Montenegro	42.3531	19.01	29-Jul-2015	30	ON406657	BOLD:AAK5632	UniLodz
Hydrometra stagnorum	MOHET234-21	LSLRZ16_2	Rijeka Crnojevica, Cetinje	Montenegro	42.3531	19.01	29-Jul-2015	30	ON406830	BOLD:AEC2693	UniLodz
Hesperocorixa sahlbergi	MOHET236-21	LSLRZ2_1	Bistrice, Donja Plavnica	Montenegro	42.2725	19.2012	21-Jul-2015	6	ON406776	BOLD:AEF2957	UniLodz
Hesperocorixa sahlbergi	MOHET237-21	LSLRZ2_2	Bistrice, Donja Plavnica	Montenegro	42.2725	19.2012	21-Jul-2015	6	ON406777	BOLD:AEF2957	UniLodz
Hesperocorixa sahlbergi	MOHET238-21	LSLRZ2_3	Bistrice, Donja Plavnica	Montenegro	42.2725	19.2012	21-Jul-2015	6	ON406852	BOLD:AEF2957	UniLodz
Hesperocorixa linnaei	MOHET239-21	LSLRZ20_1	Rijeka Crnojevica, Cetinje	Montenegro	42.3531	19.01	29-Jul-2015	30	ON406724	BOLD:ABX0448	UniLodz
Hesperocorixa linnaei	MOHET240-21	LSLRZ20_2	Rijeka Crnojevica, Cetinje	Montenegro	42.3531	19.01	29-Jul-2015	30	ON406674	BOLD:ABX0448	UniLodz
Hesperocorixa linnaei	MOHET241-21	LSLRZ20_3	Rijeka Crnojevica, Cetinje	Montenegro	42.3531	19.01	29-Jul-2015	30	ON406665	BOLD:ABX0448	UniLodz
Ranatra linearis	MOHET242-21	LSLZ8_1	Kastrat, Gjiri i Syrit te Sheganit	Albania	42.2753	19.3951	20-Jul-2015	5	ON406729	BOLD:AAL1328	UniLodz
Sigara dorsalis	MOHET201-21	SL03_1	Dusici	Montenegro	42.3439	19.3119	27-Apr-2014	30	ON406768	BOLD:AAJ6688	UniLodz
Sigara dorsalis	MOHET202-21	SL03_2	Dusici	Montenegro	42.3439	19.3119	27-Apr-2014	30	ON406816	BOLD:AAJ6688	UniLodz
Sigara dorsalis	MOHET203-21	SL03_3	Dusici	Montenegro	42.3439	19.3119	27-Apr-2014	30	ON406853	BOLD:AAJ6688	UniLodz
Sigara dorsalis	MOHET195-21	SL04_1	Donja Plavnica	Montenegro	42.2725	19.2006	28-Apr-2014	5	ON406748	BOLD:AAJ6688	UniLodz
Sigara dorsalis	MOHET196-21	SL04_2	Donja Plavnica	Montenegro	42.2725	19.2006	28-Apr-2014	5	ON406796	BOLD:AAJ6688	UniLodz
Sigara dorsalis	MOHET197-21	SL04_3	Donja Plavnica	Montenegro	42.2725	19.2006	28-Apr-2014	5	ON406856	BOLD:AAJ6688	UniLodz
Sigara dorsalis	MOHET198-21	SL04_4	Donja Plavnica	Montenegro	42.2725	19.2006	28-Apr-2014	5	ON406744	BOLD:AAJ6688	UniLodz
Sigara dorsalis	MOHET199-21	SL04_5	Donja Plavnica	Montenegro	42.2725	19.2006	28-Apr-2014	5	ON406702	BOLD:AAJ6688	UniLodz
Sigara dorsalis	MOHET200-21	SL04_7	Donja Plavnica	Montenegro	42.2725	19.2006	28-Apr-2014	5	ON406694	BOLD:AAJ6688	UniLodz
Ilyocoris cimicoides	MOHET192-21	SL09_2	Moraca	Montenegro	42.2767	19.1467	30-Apr-2014	11	ON406645	BOLD:AAF2590	UniLodz
Sigara dorsalis	MOHET259-21	SL14_1	Rruga e Lavrendit	Albania	42.0536	19.4792	01-May-2014	12	ON406669	BOLD:AAJ6688	UniLodz
Sigara dorsalis	MOHET193-21	SL14_2	Rruga e Lavrendit	Albania	42.0536	19.4792	01-May-2014	12	ON406701	BOLD:AAJ6688	UniLodz
Sigara dorsalis	MOHET194-21	SL14_3	Rruga e Lavrendit	Albania	42.0536	19.4792	01-May-2014	12	ON406824	BOLD:AAJ6688	UniLodz
Sigara dorsalis	MOHET214-21	SL19_2	Dodosi	Montenegro	42.3286	19.1358	03-May-2014	12	ON406654	BOLD:AAJ6688	UniLodz
Ilyocoris cimicoides	MOHET228-21	SSL05_1	Siniac	Montenegro	42.3661	19.155	28-Apr-2014	11	ON406691	BOLD:AAF2590	UniLodz
Notonecta maculata	MOHET215-21	SSL17_1	Poseljani	Montenegro	42.3092	19.0517	03-May-2014	46	ON406708	BOLD:AEF8405	UniLodz
Aquarius najas	MOHET216-21	SSL17_2	Poseljani	Montenegro	42.3092	19.0517	03-May-2014	46	ON406841	BOLD:AAN1521	UniLodz
Aquarius najas	MOHET217-21	SSL17_3	Poseljani	Montenegro	42.3092	19.0517	03-May-2014	46	ON406660	BOLD:AAN1521	UniLodz
Aquarius najas	MOHET218-21	SSL17_4	Poseljani	Montenegro	42.3092	19.0517	03-May-2014	46	ON406739	BOLD:AAN1521	UniLodz
Aquarius najas	MOHET219-21	SSL17_5	Poseljani	Montenegro	42.3092	19.0517	03-May-2014	46	ON406789	BOLD:AAN1521	UniLodz
Gerris lacustris	MOHET220-21	SSL17_6	Poseljani	Montenegro	42.3092	19.0517	03-May-2014	46	ON406798	BOLD:ACT3584	UniLodz
Gerris lacustris	MOHET221-21	SSL17_7	Poseljani	Montenegro	42.3092	19.0517	03-May-2014	46	ON406710	BOLD:ACT3584	UniLodz
Gerris lacustris	MOHET222-21	SSL17_8	Poseljani	Montenegro	42.3092	19.0517	03-May-2014	46	ON406733	BOLD:ACT3584	UniLodz
Gerris lacustris	MOHET223-21	SSL17_9	Poseljani	Montenegro	42.3092	19.0517	03-May-2014	46	ON406757	BOLD:ACT3584	UniLodz
Hesperocorixa sahlbergi	MOHET224-21	SSL26_1	Opstina Danilovgrad	Montenegro	42.4844	19.1538	05-May-2014	34	ON406658	BOLD:AEF2957	UniLodz
Hesperocorixa sahlbergi	MOHET225-21	SSL26_2	Opstina Danilovgrad	Montenegro	42.4844	19.1538	05-May-2014	34	ON406747	BOLD:AEF2957	UniLodz
Hesperocorixa sahlbergi	MOHET226-21	SSL26_3	Opstina Danilovgrad	Montenegro	42.4844	19.1538	05-May-2014	34	ON406690	BOLD:AEF2957	UniLodz
Hesperocorixa sahlbergi	MOHET227-21	SSL26_4	Opstina Danilovgrad	Montenegro	42.4844	19.1538	05-May-2014	34	ON406788	BOLD:AEF2957	UniLodz
Hesperocorixa sahlbergi	MOHET260-21	SSL27_1	Bandici	Montenegro	42.4845	19.1225	05-May-2014	34	ON406843	BOLD:AEF2957	UniLodz
Hesperocorixa sahlbergi	MOHET261-21	SSL27_2	Bandici	Montenegro	42.4845	19.1225	05-May-2014	34	ON406804	BOLD:AEF2957	UniLodz
Hydrometra stagnorum	MOHET229-21	SSL28_1	Glavni grad Podgorica	Montenegro	42.471	19.1386	05-May-2014	46	ON406743	BOLD:AEC2693	UniLodz
Hydrometra stagnorum	MOHET230-21	SSL28_2	Glavni grad Podgorica	Montenegro	42.471	19.1386	05-May-2014	46	ON406771	BOLD:AEC2693	UniLodz
Hydrometra stagnorum	MOHET231-21	SSL28_3	Glavni grad Podgorica	Montenegro	42.471	19.1386	05-May-2014	46	ON406781	BOLD:AEC2693	UniLodz
Nepa cinerea	MOHET232-21	SSL28_4	Glavni grad Podgorica	Montenegro	42.471	19.1386	05-May-2014	46	ON406858	BOLD:AAK8359	UniLodz
Micronecta pusilla	MOHET208-21	SSL62_1	Dracevica	Montenegro	42.2042	19.19	06-May-2014	24	ON406741	BOLD:AEG9578	UniLodz
Micronecta pusilla	MOHET209-21	SSL62_3	Dracevica	Montenegro	42.2042	19.19	06-May-2014	24	ON406717	BOLD:AEG9578	UniLodz
Micronecta pusilla	MOHET210-21	SSL62_4	Dracevica	Montenegro	42.2042	19.19	06-May-2014	24	ON406821	BOLD:AEG9578	UniLodz
Micronecta pusilla	MOHET211-21	SSL62_5	Dracevica	Montenegro	42.2042	19.19	06-May-2014	24	ON406726	BOLD:AEG9578	UniLodz
Micronecta pusilla	MOHET212-21	SSL74_1	Gradska opstina Golubovci	Montenegro	42.2344	19.1931	06-May-2014	1	ON406837	BOLD:AEG9578	UniLodz
Micronecta pusilla	MOHET213-21	SSL74_2	Gradska opstina Golubovci	Montenegro	42.2344	19.1931	06-May-2014	1	ON406779	BOLD:AEG9578	UniLodz
Micronecta pusilla	MOHET204-21	SSL90_1		Montenegro	42.2257	19.1607	07-May-2014	14	ON406661	BOLD:AEG9578	UniLodz
Micronecta pusilla	MOHET205-21	SSL90_2		Montenegro	42.2257	19.1607	07-May-2014	14	ON406693	BOLD:AEG9578	UniLodz
Micronecta pusilla	MOHET206-21	SSL90_3		Montenegro	42.2257	19.1607	07-May-2014	14	ON406745	BOLD:AEG9578	UniLodz
Gerris lacustris	MOHET207-21	SSL95_6	Vranjina	Montenegro	42.2811	19.1398	08-May-2014	8	ON406761	BOLD:ACT3584	UniLodz
Ilyocoris cimicoides	MOHET082-20	HET_TOY_18.1_1	Spring Sinjac	Montenegro	42.366	19.155	01-Jun-2018	11	N/A	N/A	UniLodz	NUMT's
Ilyocoris cimicoides	MOHET093-20	HET_TOY_20.2_1	Spring Karuc	Montenegro	42.358	19.107	02-Jun-2018	13	N/A	N/A	UniLodz	NUMT's
